# 1 Structural basis of human IL-18 sequestration by the decoy receptor IL- 2 18 binding protein (IL-18BP) in inflammation and tumor immunity

3  
4 Sammy Detry<sup>1,2,#</sup>, Julie Andries<sup>1,2,#</sup>, Yehudi Bloch<sup>1,2</sup>, Cem Gabay<sup>3</sup>, Danielle Clancy<sup>1,2</sup>, Savvas N. Savvides<sup>1,2,\*</sup>

5 <sup>1</sup>Unit for Structural Biology, Department of Biochemistry and Microbiology, Ghent University, Technologiepark 71, 9052 Ghent,  
6 Belgium.

7 <sup>2</sup>Unit for Structural Biology, VIB Center for Inflammation Research, Technologiepark 71, 9052 Ghent, Belgium.

8 <sup>3</sup>Division of Rheumatology, Department of Medicine, Geneva University Hospitals & Faculty of Medicine University of Geneva,  
9 CH-1211 Geneva 14, Switzerland.

10 #These authors contributed equally. ; \*Corresponding author: [savvas.savvides@ugent.be](mailto:savvas.savvides@ugent.be)

## 11 12 ORCID

13 Sammy Detry: 0000-0001-6981-5804  
14 Julie Andries: 0000-0001-8446-9786  
15 Yehudi Bloch: 0000-0001-7924-3539  
16 Cem Gabay: 0000-0001-6853-3063  
17 Danielle Clancy: 0000-0002-8700-3356  
18 Savvas N. Savvides: 0000-0003-3420-5947

## 19 20 Keywords

21 Interleukin 18, Interleukin 18 binding protein, crystal structure, decoy receptor, inflammation, cytokine storm, viral  
22 infection

## 23 24 25 Abstract

26 Human Interleukin-18 (IL-18) is an omnipresent pro-inflammatory cytokine of the IL-1 family with central  
27 roles in autoimmune and inflammatory diseases, and serving as a staple biomarker in the evaluation of  
28 inflammation in physiology and disease, including the inflammatory phase in COVID-19. The sequestration  
29 of IL-18 by its soluble decoy receptor IL-18 Binding Protein (IL-18BP) is critical to the regulation of IL-18  
30 activity. Since an imbalance in expression and circulating levels of IL-18 is associated with disease, structural  
31 insights into how IL-18BP outcompetes binding of IL-18 by its cognate cell-surface receptors would be  
32 highly desirable. However, the structure of human IL-18BP in complex with IL-18 had remained elusive.  
33 Here, we elucidate the sequestration mechanism of human IL-18 mediated by IL-18BP based on the crystal  
34 structure of the IL-18:IL-18BP complex. These detailed structural snapshots reveal the interaction  
35 landscape leading to the ultra-high affinity of IL-18BP towards IL-18 and identify substantial differences  
36 with respect to previously characterized complexes of IL-18 with IL-18BP of viral origin. Furthermore, our  
37 structure captured a fortuitous higher-order assembly between IL-18 and IL-18BP coordinated by a  
38 disulfide-bond distal to the binding surface connecting IL-18 and IL-18BP molecule from different  
39 complexes, resulting in a novel complex with 2:2 stoichiometry. This tetrapartite assembly was found to  
40 restrain IL-18 activity more effectively than the canonical 1:1 complex. Collectively, our findings will provide  
41 a framework for innovative structure-driven therapeutic strategies and further functional interrogation of  
42 IL-18 in physiology and disease.

43

## 44 Significance statement

45 Elevated levels of interleukin-18 (IL-18) have long been implicated in numerous inflammatory diseases  
46 while also displaying potent anti-tumoral activities. Recent research on COVID-19 has now underscored the  
47 role of IL-18 and IL-18 binding protein (IL-18BP), a soluble receptor serving to regulate IL-18 activity, as key  
48 players in viral immunity and as promising biomarkers and predictors of disease severity. In this work, we  
49 present detailed structural insights into how human IL-18 and IL-18BP interact thereby completing the  
50 structural repertoire of IL-18 in complex with its cognate human receptors and viral decoy receptors. Our  
51 findings will support structure-based efforts to either disrupt or enhance the interactions of IL-18 with its  
52 cognate receptors for therapeutic purposes.

53

## 54 Introduction

55 Originally discovered in mice as Interferon- $\gamma$ -inducing factor (IGIF), Interleukin-18 (IL-18) was found to  
56 be a potent inducer of interferon- $\gamma$  (IFN- $\gamma$ ) production in synergy with IL-12 upon exposure to intracellular  
57 pathogens (1–3). It was subsequently cloned and identified as an 18 kDa cytokine belonging to the IL-1  
58 cytokine family, and renamed to IL-18 (4). Similar to other IL-1 family cytokines, IL-18 is expressed as an  
59 inactive precursor protein that requires cleavage by caspase-1 for full biological activity (5, 6). While  
60 approximately 80% of pro-IL-18 is retained intracellularly, the rest is released by macrophages/monocytes  
61 and dendritic cells after maturation by caspase-1 (7, 8). Mature IL-18 initiates signaling by establishing a  
62 tripartite complex with IL-18 receptor alpha (IL-18R $\alpha$ ) and IL-18 receptor beta (IL-18R $\beta$ ), the latter also  
63 known as IL-18 receptor accessory protein and IL-1R7. The heterodimerization of the receptors'  
64 intracellular Toll/IL-1 receptor (TIR) domains triggers recruitment of the adaptor protein myeloid  
65 differentiation primary response 88 (MyD88) which further activates the downstream signaling cascade  
66 through IRAK-1/4, TRAF6 and NF $\kappa$ B (9–12). IL-18 is mainly involved in the activation of NK and T helper 1  
67 (Th1) cells and IFN- $\gamma$  production in response to intracellular bacteria or viruses (13, 14).

68 Due to its highly proinflammatory and pleiotropic activity, IL-18 signaling is highly regulated at many  
69 levels to prevent uncontrolled inflammation. Akin to other IL-1 family cytokines, this regulation is achieved  
70 through gene regulation (15), caspase-1 activation (5, 6) and importantly, is also mediated by a soluble  
71 decoy receptor (16). Once IL-18 is activated and released from immune cells, its availability is mainly  
72 regulated by sequestration by IL-18 binding protein (IL-18BP), a dedicated soluble decoy receptor-like  
73 protein capable of blocking the biological activity of IL-18 (17). Even though IL-18BP functions as a decoy  
74 receptor, it is not homologous to any extracellular domain of the IL-18 receptors and is encoded as a  
75 separate gene (18), an oddity in the cytokine field (19). However, bioinformatic approaches have proposed  
76 that IL-18BP is evolutionary related to TIGIRR-1 (aka IL-1R9) and is thus regarded as a member of the IL-1  
77 receptor family. In addition, sequence and functional homology lead to the identification of IL-18BP  
78 orthologs in all orthopoxviruses (20, 21), including ectromelia virus (ectvIL-18BP) and Yaba-Like Disease  
79 Virus (yldvIL-18BP) (22, 23), that act as virulence factors by attenuating immune responses mediated by IL-  
80 18.

81 Not only is human IL-18BP present in the serum at a 20-fold molar excess (24), it also has an exceptionally  
82 high affinity ( $K_D \sim 300$  pM) for IL-18 (25), in contrast to IL-18R $\alpha$ 's affinity towards hIL-18 which is reported  
83 to be several orders of magnitude weaker ( $K_D \sim 69$  nM) (26). Intriguingly, the affinity of viral IL-18BPs for  
84 human IL-18 is considerably lower than human IL-18BP ( $K_D \sim 1$  nM), although they display picomolar affinity  
85 towards mouse IL-18 (25). As a result, IL-18 is sequestered by IL-18BP under homeostatic conditions,  
86 thereby preventing it from signaling through its receptors and evoking unwanted pro-inflammatory  
87 responses. Interestingly, IL-18-induced IFN- $\gamma$  upregulates IL-18BP expression, creating a negative feedback  
88 loop to dampen and resolve inflammation (27, 28). Several (auto)immune diseases have been associated  
89 with increased levels of IL-18 such as rheumatoid arthritis (RA) (29, 30), Crohn's disease (CD) (31, 32), and  
90 systemic lupus erythematosus (SLE) (33–35). As IL-18BP has a high IL-18 sequestration capacity (35), the  
91 balance between IL-18/IL-18BP and the concentrations of free IL-18, instead of total IL-18, are more  
92 relevant to measure to evaluate inflammatory responses (36). Elevated levels of free IL-18 have been  
93 identified in hyperinflammatory diseases such as macrophage activation syndrome (MAS), and systemic  
94 juvenile idiopathic arthritis (28, 37). Furthermore, in mouse models of MAS, IL-18BP-deficient mice  
95 developed more severe disease manifestations, pointing to the crucial role of IL-18BP activity in this setting  
96 (28). In addition, elevated levels of IL-18 in blood and bronchoalveolar lavage fluid (BALF) from coronavirus  
97 patients have been shown to correlate with COVID-19 disease severity and worse clinical outcomes (38–  
98 40).

99 Unsurprisingly, IL-18 neutralizing antibodies or recombinant IL-18BP have been successfully used to  
100 mitigate IL-18 related pathologies (41, 42). Clinical trials using recombinant hIL-18BP (Tadekinig  $\alpha$ ) for  
101 Adult-onset Still's disease (AOSD), rheumatoid arthritis (RA) and plaque psoriasis show promising safety  
102 and indicative signs of efficacy in patients with AOSD (43, 44). On the other hand, administration of  
103 recombinant IL-18 in mouse tumor models was shown to elicit favorable anti-tumoral effects in synergy  
104 with chimeric antigen receptor T (CAR-T) and immune checkpoint inhibitors (45). Whereas such findings  
105 provided a strong rationale for the therapeutic potential of IL-18 in cancer (46), its efficacy has not lived up  
106 to expectations (47), the culprit being the concomitant increase in the serum concentration of IL-18BP by  
107 up to 100-fold in patients (46, 48).

108 To aid further advancements in the mechanistic interrogation of IL-18 sequestration by IL-18BP and the  
109 therapeutic targeting of hIL-18 and hIL-18BP in infectious diseases, inflammation and cancer, structural  
110 details of their complex and of interaction interface to high resolution would be opportune. Here, we  
111 present the crystal structure of human IL-18 in complex with human IL-18BP. This study shows that hIL-  
112 18BP binds hIL-18 at the same epitope as IL-18R $\alpha$  and viral IL-18BPs using a large hydrophobic patch flanked  
113 by two tightly fitting hydrophobic pockets complemented by salt bridges. A crucial advance in our  
114 crystallization efforts was the elimination of the flexible N-terminus and minimization of heterogenous  
115 glycosylation patterns of hIL-18BP while retaining functional and biological activity. Moreover, we  
116 discovered a novel disulfide-linked interface resulting in an unexpected tetrameric assembly of hIL-18 and  
117 hIL-18BP. The structural model presented here is imperative to validate previous models, map key  
118 differences between human and viral orthologs of IL-18BP and allow advancements in the design of novel  
119 inhibitors or antagonists.

## 120 Results

### 121 Human IL-18BP can be truncated to a bioactive core structure with reduced glycosylation

122 To enable structural studies of the human IL-18BP:IL-18 complex by X-ray crystallography we initially  
123 considered clinical grade human IL-18BP (Tadekinig alfa) that was used in a phase 2 clinical trial to evaluate  
124 the safety and efficacy of IL-18BP in adult-onset Still's disease (43). However, due to the extensive  
125 glycosylation of this protein and the need to create glycan-engineered protein amenable to structural  
126 studies by X-ray crystallography we produced full-length hIL-18BP in transiently transfected HEK293S  
127 MGAT1  $-/-$  cells allowing for N-linked glycosylation as Man<sub>5</sub>GlcNAc<sub>2</sub> glycans (49) and mature hIL-18 in *E.*  
128 *coli*. Using size-exclusion-chromatography (SEC) and in-line multi-angle laser light scattering (MALLS) we  
129 found that full-length hIL-18BP was heavily glycosylated with nearly 50% of its mass accounted for by  
130 glycans (**Figure 1A** and **Supplemental Table 1**), consistent with predictions (**Figure S1A**). Furthermore, the  
131 distribution of mass across the SEC-MALLS peak for full-length hIL-18BP, the diffuse electrophoretic  
132 mobility of the purified protein in SDS-PAGE (**Figure 1A&B**), and large shifts in mass upon treatment with  
133 endoglucanases and O-glycosidases suggested heterogeneous glycosylation. Based on our experience with  
134 producing secreted glycoproteins with N-linked glycosylation and similar protein families in the HEK293T  
135 and HEK293S MGAT1  $-/-$  cell lines for structural biology (50–53), we reasoned that this most likely originates  
136 from O-glycans and possible differences in N- and O-glycosylation site occupancy. Initial crystallization trials  
137 using purified hIL-18BP<sub>FL</sub>:IL-18 complex containing glycan-shaved hIL-18BP<sub>FL</sub> and displaying apparent  
138 stoichiometry of 1:1 as evaluated by SEC-MALLS, did not lead to candidate crystallization conditions even  
139 when employing hIL-18BP<sub>FL</sub>:IL-18 complex up to 30 mg/mL. Such apparent high solubility during  
140 crystallization trials was deemed to be consistent with the observed extensive and heterogeneous  
141 glycosylation of hIL-18BP<sub>FL</sub> (**Figure 1A** and **Supplemental Table 1**). Therefore, we sought to produce  
142 alternative versions of hIL-18BP that would be more amenable to structural studies. Sequence alignment  
143 of hIL-18BP with homologous viral IL-18BPs, for which structural information is available (22, 23), suggested  
144 that the expected core beta-sandwich domain of hIL-18BP (residues 63-171) might be flanked by N- and C-  
145 terminal stretches (residues 31-62 and 170-194, respectively) bearing intrinsic disorder and the majority of  
146 the predicted O-glycosylation sites (**Figure S1A** and **S1B**).

147 To this end we produced hIL-18BP lacking the N- and/or C-terminal regions in HEK293S MGAT1  $-/-$   
148 cells. We found that only hIL-18BP truncated at the N-terminus (residues 63-194), hereafter termed hIL-  
149 18BP<sub>ΔN</sub>, could be sufficiently produced for structural studies. SEC-MALLS analysis of hIL-18BP<sub>ΔN</sub> revealed  
150 the loss of 3 kDa of protein mass and 5.5 kDa of glycans (**Figure 1A** and **Supplemental Table 1**), confirming  
151 that the N-terminus of hIL-18BP is heavily glycosylated. Additional trimming of N-linked Man<sub>5</sub>GlcNAc<sub>2</sub>  
152 glycans using Endoglycosidase H (Endo H) resulted in a further loss of 2.5 kDa of N-linked glycans (**Figure**  
153 **1A, 1B**).

154 We initially verified the functional activity of hIL-18BP<sub>ΔN</sub> treated with Endo H (IL-18BP<sub>ΔN-EH</sub>) in terms  
155 of its ability to sequester hIL-18 in stoichiometric fashion and high affinity. Indeed, SEC-MALLS analysis  
156 showed that hIL-18BP<sub>ΔN-EH</sub> can establish a monodisperse complex with hIL-18 according to a 1:1

157 stoichiometry (**Figure 1C** and **Supplemental Table 1**). Using isothermal titration calorimetry (ITC), we  
158 compared the thermodynamic binding profiles and affinities of hIL-18BP<sub>FL</sub>, hIL-18BP<sub>ΔN-EH</sub>, and the hIL-18  
159 cognate receptor (IL-18Rα) to hIL-18 (**Figure 1D**). Our data show that hIL-18BP<sub>ΔN-EH</sub> and hIL-18BP<sub>FL</sub> are  
160 virtually indistinguishable from each other in their thermodynamic binding profiles and sub-nM affinities  
161 towards hIL-18. In contrast and consistent with previously published data (26), human hIL-18Rα binds to  
162 hIL-18 with lower affinity ( $K_D=4.7$  nM) than hIL-18BP. However, the binary complex affinity measured here  
163 is markedly higher than previously reported affinities ( $K_D\sim 60$  nM) (26) by surface plasmon resonance.

164 Finally, we interrogated the biological activity of hIL-18BP<sub>ΔN-EH</sub> by using the hIL-18-responsive  
165 macrophage cell line, KG-1, the activity of which is manifested by NFκB signaling and pro-inflammatory  
166 cytokine and chemokine production (54). In this context, we measured the amount IL-8 as secreted from  
167 KG-1 cells upon hIL-18 stimulation, and found that both hIL-18BP<sub>FL</sub> and hIL-18BP<sub>ΔN-EH</sub> displays comparable  
168 inhibitory activities. (**Figure 1E**).

### 169 Structural mimicry underlies the sequestration of human IL-18 by IL-18BP

170 Structural insights into the sequestration of human IL-18 by its cognate decoy receptor IL-18BP had  
171 remained elusive despite the growing importance of IL-18BP in physiology and disease. Using the truncated  
172 and glycan-shaved hIL-18BP<sub>ΔN-EH</sub> we purified crystallization-grade hIL-18: hIL-18BP<sub>ΔN-EH</sub> complex and  
173 determined the crystal structure of the complex to 1.8 Å resolution by molecular replacement using crystal  
174 structure of ectromelia poxvirus IL-18 binding protein (ectvIL-18BP) (23) (pdb 3f62) as a search model  
175 (**Figure 2A**, **Table 1**). Crystallographic refinement and the quality of the ensuing electron density maps were  
176 enhanced after correcting the X-ray data for data anisotropy using the STARANISO server (55). The crystal  
177 asymmetric unit contains one copy of the 1:1 complex and reveals how hIL-18BP uses the side of its h-type  
178 immunoglobulin β-sandwich fold to bind the β-trefoil structure hIL-18 (**Figure 2A**). hIL-18BP harbors two  
179 internal disulfide bridges connecting strands A and B (Cys86-Cys150), and B and F (Cys64-Cys89). In  
180 addition, three predicted N-glycan sites are occupied by an N-Acetylglucosamine residue (GlcNAc) at  
181 residues Asn79, Asn103 and Asn147. Our model for hIL-18BP starts at the beginning of the hIL-18BP<sub>ΔN</sub>  
182 construct, i.e. Gln63, however no density was observed past Ala170 in the crystal solvent channels,  
183 consistent with the predicted disorder of the C-terminal tail (**Figure 2C**, **Figure S1B**). Human IL-18 features  
184 its signature β-trefoil fold and closely resembles the structure of unbound hIL-18 (pdb 3wo2) (all-atom  
185 r.m.s.d.=1.8 Å). Structure-based sequence alignments of human IL-18BP and structural superpositions  
186 against the two structurally characterized viral IL-18BPs, ectromelia virus IL-18BP (ectvIL-18BP) and yaba-  
187 like disease virus disease IL-18BP (yldvIL-18BP), and domain 3 of hIL-18Rα (hIL-18Rα<sub>D3</sub>) establish the strong  
188 conservation of the adopted fold, albeit with major variations in the CD loop mediating hIL-18 binding and  
189 AB loop (**Figure 2B**, **Figure 2C**, **Figure 2D**). Importantly, these analyses reveal that structural mimicry and  
190 direct steric competition underlie the sequestration of human hIL-18 by hIL-18BP (**Figure 2C**).

191 Specifically, human IL-18BP covers the top of the hIL-18 β-barrel with one side of its β-sandwich scaffold  
192 composed of strands C, G and F and is slightly inclined to enable protrusion of loops FG and BC into the  
193 barrel. Additionally, residues from the CD loop and D strand mediate important interactions on the other

194 side of the sheet (**Figure 2A**). In light of the plethora of structural information on human/viral IL-18BPs and  
195 human IL-18R $\alpha$  in complex with hIL-18, curation and comparison of the observed interaction interfaces to  
196 distil key structure-function insights presents with considerable challenges. At the same time, annotation  
197 of amino acid positions that have been interrogated by mutagenesis would also be desirable. Together,  
198 such analyses could lead to a rationale for the exquisitely efficient sequestration of hIL-18 by hIL-18BP and  
199 might further fuel protein engineering approaches to modulate this sequestration potential. Therefore, we  
200 sought to develop a representation scheme that would allow effective parallel comparison of all structural  
201 data available together with mutagenesis data (**Figure 3B**). The binding interface can be subdivided into  
202 three sites: Site A consists of complementary hydrophobic patches on both hIL-18 and hIL-18BP. Sites B  
203 and C each engage a phenylalanine on hIL-18BP, Phe106 and Phe95 respectively, to protrude into a  
204 hydrophobic cavity on hIL-18 sealed by salt bridges and hydrogen-binding interactions (**Figure 3A**).  
205 Sequence alignments of hIL-18BP orthologs among vertebrates (**Figure S2A**) allows mapping of highly  
206 conserved residues on the surface of hIL-18BP that mediate sequestration of hIL-18, and shows that this  
207 region of hIL-18BP is the most conserved compared to any other part of the decoy receptor (**Figure S2B**).  
208 This suggests that the observed human IL-18BP:IL-18 complex can serve as a structural representative for  
209 all such complexes across species. When comparing the interface of human IL-18BP with its viral  
210 counterparts, these phenylalanine residues are largely conserved, with the exception of yldvIL-18BP, which  
211 contains a threonine instead of phenylalanine at site B. The most striking difference is the lack of salt bridges  
212 in viral IL-18BPs at site C. Conversely, human IL-18R $\alpha$  does form these salt bridges but lacks the  
213 phenylalanine residues protruding into the hydrophobic cavity of hIL-18, while also lacking another  
214 hydrophobic substitute. At site B, hIL-18R $\alpha$  also lacks the phenylalanine residue, but substitutes it for a  
215 methionine to fill the hydrophobic pocket (**Figure 3B**). Overall, site A is very similar for all interfaces, with  
216 mainly conservative substitutions of key interacting residues. The absence of these phenylalanine residues  
217 may explain the higher affinity of human IL-18BP to IL-18 than its receptor. Similar to IL-18R $\alpha$ , but in  
218 contrast to the viral IL-18BPs, human IL-18BP exploits additional interactions via two side-chain-to-main-  
219 chain hydrogen bonds at site A.

220

#### 221 [A disulfide-linked interaction site mediates a novel higher-order IL-18:IL-18BP complex](#)

222 An intriguing feature of the IL-18–IL-18BP complex concerns an unexpected disulfide bridge between Cys74  
223 of hIL-18 in the canonical IL-18:IL-18BP complex and Cys131 of IL-18BP participating in a symmetry-related  
224 complex. This results in a covalent tetrameric assembly with a 2:2 stoichiometry and twofold symmetry  
225 (**Figure 4A**). We note that such higher-order assembly was not observed in the preparatory stages of pre-  
226 crystallization samples as assessed by SEC-MALLS or SDS-PAGE (**Figure 1B and 1C**). However, the sample  
227 was concentrated to 30 mg/ml prior to crystallization. To verify whether such a higher order complex  
228 originated during this final protein concentration step, the concentrated sample was diluted back to 0.5  
229 mg/ml and analyzed by SDS-PAGE and SEC-MALLS. SDS-PAGE shows a band at ~38 kDa which can be  
230 resolved to the constituent protein components upon the addition of the reducing agent DTT prior to  
231 loading the sample, indicating the presence of a disulfide linked dimer (**Figure 4B**). We confirmed by mass

232 spectrometry that both hIL-18 and hIL-18BP were present in this disulfide linked protein adduct, verifying  
233 a heterodimer as opposed to a homodimer of either. Additionally, SEC-MALLS shows that more than 90%  
234 of the previously concentrated sample now exists as a tetramer of 74 kDa, rather than the expected  
235 canonical IL-18:IL-18BP complex of 37 kDa (**Figure 4C**). Protein conjugate analysis of SEC-MALLS data  
236 validated the presence of both hIL-18BP and hIL-18 in the complex with a 2:2 stoichiometry, as any other  
237 combination of proteins and their glycans would not be compatible with their respective molecular masses.

238 Interestingly, in the structure of unbound hIL-18 and when in complex with its decoy and signaling  
239 receptors, the cysteine involved in the observed novel disulfide bond with IL-18BP is part of a  $3_{10}$  helix and  
240 is not surface exposed (**Figure 4A**, left panel). This region in inbound IL-18 is rather amphipathic in terms of  
241 physicochemical properties and interacts with several detergent molecules (CHAPS) in pdb 3wo2 (26) .  
242 Thus, to participate in the observed disulfide bond, the cysteine has flipped outwards and is accompanied  
243 by a structural rearrangement thereby disrupting the helical structure (**Figure 4A**, left panel). Interestingly,  
244 an ensemble of structural models of IL-18 determined by NMR has shown this helix to be very flexible (56),  
245 which would favor such dynamics. We note that for the reported crystals structure of hIL-18 complexed  
246 with ectvIL-18BP and yldvIL-18BP (pdb 3f62 and 4eee respectively), all free cysteines were mutated to  
247 serine, thereby excluding the possibility of such a disulfide linkage, although this particular helix/loop  
248 segment was not modelled due to its apparent flexibility. Surrounding the cysteine disulfide bridge is a  
249 novel interface mediated by the beta strands E, B, D and D' of the opposite side of the beta-sandwich  
250 compared to the canonical interface and is maintained by a several hydrophobic residues on both  
251 molecules.

252 Because this hetero-tetramer was only initially observed with IL-18BP $_{\Delta N-EH}$  lacking the N-terminal and N-  
253 glycans, we also investigated if a similar higher-order complex could be formed with IL-18BP $_{FL}$  or  
254 endogenously glycosylated IL-18BP $_{\Delta N}$ . Full-length IL-18BP was complexed with IL-18, concentrated to 0.5  
255 mg/mL and analyzed by SEC-MALLS. No tetrameric complex was observed using IL-18BP $_{FL}$ , either in its  
256 glycosylated or deglycosylated form, suggesting that removal of the N-terminal segment of IL-18BP  
257 promotes the formation of this hetero-tetrameric complex (**Figure 4C**). We note that Cys51 is part of the  
258 truncated and likely pairs up with Cys131 in the full-length protein, thus preventing heterotetramer  
259 formation. Endogenously glycosylated IL-18BP $_{\Delta N}$ , without Endo H treatment, also formed a tetrameric  
260 complex with IL-18 at high concentrations, albeit at a lower rate than IL-18BP $_{\Delta N-EH}$  (**Figure 4D**).

261 The presence of a disulfide bridge linking IL-18BP $_{\Delta N}$  and IL-18 distal to the binding interface in the  
262 hetero-tetrameric assembly observed here may result in better sequestration and inhibition of IL-18 than  
263 in the canonical 1:1 complex. Furthermore, the site where disulfide-linked IL-18BP engages on IL-18 would  
264 also sterically clash with the eventual binding site of IL-18 to domain 1 of IL-18R $\alpha$ . To test this, both the  
265 heterodimeric or hetero-tetrameric complex of IL-18BP $_{\Delta N-EH}$  and IL-18 was purified and used to stimulate  
266 KG-1 cells. While both the dimeric and tetrameric complex inhibited IL-18 activity compared to IL-18 alone,  
267 the tetrameric assembly restrained IL-18 activity more effectively than the dimeric complex, resulting in  
268 less inflammatory cytokine production from KG-1 cells (**Figure 4E**).

269

## 270 Discussion

271 Over the past two decades and in the absence of an experimentally determined structure for the human  
272 IL-18–IL-18BP complex, numerous studies have used orthogonal methods to predict how human IL-18BP  
273 interacts with human IL-18 to efficiently sequester and prevent signaling. To date, structural features and  
274 binding interfaces between human IL-18 and human IL-18BP have been inferred from computational  
275 models (44), human and viral mutagenesis studies (45–49) and homologous structures of viral IL-18BPs in  
276 complex with human IL-18 (22, 23). Additionally, the ternary assembly of human IL-18 in complex with its  
277 cognate receptors, IL-18R $\alpha$  and IL-18R $\beta$  (26), has shed some light on the potential for competitive binding  
278 of human IL-18BP. The high-resolution structural analysis of human IL-18BP bound to IL-18 presented here  
279 is imperative to further understand and exploit the ultra-high affinity binding mode that characterizes this  
280 unique decoy receptor-like protein (22, 23). Human IL-18BP binds the same epitope of hIL-18 used by viral  
281 IL-18BPs to compete with the third ectodomain of hIL-18R $\alpha$ . The majority of the interface (Site A) consists  
282 of two large, complementary hydrophobic patches, mimicking the landscape of hydrophobic peaks and  
283 troughs on each side of the interface, supplemented with two side-chain-to-main-chain hydrogen bonds.  
284 Comparing the structure of hIL-18BP with its viral orthologs confirms that this large hydrophobic patch on  
285 site A is highly conserved. yldvIL-18BP contains some additional hydrophobic residues (Ile78 and Leu80) on  
286 the DE loop interacting with hIL-18 (Leu 5 and Glu6) at the perimeter of the interface. In all other structures,  
287 except yldvIL-18BP, this loop is constrained as an additional  $\beta$ D' strand. On each side of the hydrophobic  
288 patch, a phenylalanine on hIL-18BP is tightly inserted inside hydrophobic cavities on hIL-18 and additionally  
289 locked down by salt bridges (Site B and C, **Figure 3B**). Mutating either phenylalanine residues to alanine  
290 reduces the ultra-high picomolar affinity of hIL-18BP down to low-nanomolar affinity (22, 23, 57).  
291 Mutations of the corresponding residues in viral IL-18BPs have a similar effect, highlighting the importance  
292 of these specific residues for binding. Interestingly, in hIL-18R $\alpha$  the corresponding residue is either  
293 substituted by methionine (Site B) or completely lacking (Site C), although site B is flanked by additional  
294 hydrophobic residues residing on hIL18R $\alpha$ 's longer CD' loop. The absence of these seemingly critical  
295 phenylalanine residues may, in part, explain the higher affinity of hIL-18BP to IL-18 than its receptor.  
296 Similarly, mutating Glu108 and Glu106 on hIL-18BP involved in the salt bridges at Site B accordingly resulted  
297 in a lower affinity, as well as mutating Lys53 on hIL-18 which is located on the other end of the salt bridges  
298 (58, 59). Mutations in Site C particularly have not been reported, because in both viral structures the  
299 corresponding residues (Glu48 in ectvIL-18BP and His51 in yldvIL-18BP) are not involved in salt bridge  
300 formation. Overall, it is clear that hIL-18BP utilizes a unique constellation of key residues, contributing to  
301 ultra-high affinity binding to IL-18, however further investigation is required to determine binding hotspots  
302 important for this interaction. Whether or not the lower affinity of viral IL-18BPs is actually advantageous  
303 or disadvantageous for their function is unclear.

304 Unexpectedly, we observed a higher order assembly of IL-18 and IL-18BP in our crystallographic  
305 model, coordinated by an otherwise buried cysteine in IL-18, disrupting an alpha helix in the process. Using  
306 SEC-MALLS and mass spectrometry, we confirmed the formation of a hetero-tetramer, consisting of two  
307 complexes of IL-18:IL-18BP, with an additional interaction interface distal to the canonical binding site of



308 IL-18BP. Interestingly, this hetero-tetrameric complex restrained IL-18 activity more effectively than the  
309 canonical dimeric 1:1 complex. Given that high concentrations and removal of the N-terminal region appear  
310 to be required, it is likely not biologically relevant. However, this fortuitous observation suggests that this  
311 interface may be amenable to further engineering to increase the sequestration potency of IL-18BP,  
312 possibly in combination with domains 1 and 2 of IL-18R $\alpha$ . It brings to light plasticity in IL-18, the possible  
313 reactivity of Cys131 in IL-18BP, and the possible utilization of a hydrophobic patch at opposite ends to the  
314 IL-18:IL-18BP interface to create a new interaction interface. An analogous yet distinct bivalence has been  
315 observed in viral yldvIL-18BP. This ortholog lacks a highly conserved phenylalanine residue in site B,  
316 however it compensates for this by forming a 2:2 complex with IL-18, driven by disulfide-linked IL-18BP  
317 homodimerization (23). However, it is important to note that the 2:2 hetero-tetrameric complex seen here  
318 for human IL-18BP engages a separate interface, and is driven by an additional interaction with IL-18  
319 cytokine.

320 The structural model presented here will facilitate further the structure-driven development of  
321 novel therapeutics to either disrupt or mimic hIL-18BP binding. Aberrant IL-18 signaling has been implicated  
322 in numerous inflammatory diseases including RA, AOSD, SLE, sickle cell disease, and more recently, the  
323 inflammatory phase of coronavirus infection. (28, 29, 36, 37, 60). Coronavirus disease (COVID-19), caused  
324 by the SARS-CoV2 virus, displays a broad range of clinical symptoms, resulting in disease severity extending  
325 from mild to fatal outcomes. Accumulating evidence has shown that tissue damage in the later stages of  
326 severe COVID-19 infection is driven by cytokine release syndrome (CRS), also known as cytokine storm (38,  
327 39, 61). Recent studies have detected elevated levels of IL-18 in patients with moderate and severe COVID-  
328 19 infection, which strongly correlated with disease severity (38, 39, 62). Longitudinal analysis of patients  
329 infected with SARS-CoV-2 showed IL-18 levels remained elevated in severe COVID-19 patients admitted to  
330 ICU, while cytokine levels declined over time in moderately affected patients. Moreover, both IL-18 and IL-  
331 18BP have been identified as promising biomarkers to predict disease severity and likelihood of death after  
332 SARS-CoV-2 infection (38, 63). Elevated levels of IL-18 were also detected in multisystem inflammatory  
333 syndrome (MIS) and Kawasaki syndrome in children following SARS-CoV-2 infection, and may be used as a  
334 biomarker to distinguish these diseases from similar hyperinflammatory syndromes (37). Increased IL-18  
335 production has also been associated with activation of cytotoxic mucosal-associated invariant T (MAIT) cells  
336 during coronavirus infection, leading to lung tissue damage and increased disease severity (40). These  
337 studies suggest that modulation of IL-18 activity may represent a novel therapeutic opportunity for COVID-  
338 19, however, no clinical trials with recombinant IL-18BP or IL-18-specific antagonistic have yet been  
339 initiated (64, 65). However, because of the pleiotropic activity of IL-18, there will likely be a narrow  
340 therapeutic window to exploit the beneficial activity of IL-18 for effective viral clearance, while avoiding  
341 aberrant inflammation and tissue damage associated with high IL-18 activity during late-stage infection. In  
342 addition, IL-18 has been shown to display potent anti-tumor activity, however clinical trials using  
343 recombinant IL-18 have shown limited efficacy (42). IL-18BP, produced in the tumor microenvironment,  
344 has been identified as an 'immune checkpoint', hampering the therapeutic application of recombinant IL-  
345 18 in cancer (66). Directed evolution of yeast-displayed mouse IL-18 variants identified a decoy-resistant  
346 IL-18 that retains signaling activity but escapes inhibition by IL-18BP. This IL-18 variant displayed potent  
347 cytotoxic T cell activation, NK cell maturation and tumor growth inhibition compared to its wildtype

348 counterpart (66). The high-resolution structural models presented here, in particular the experimentally  
349 determined interaction interface of IL-18 and human IL-18BP, will be of crucial importance for additional  
350 protein engineering and future drug design for the development of novel therapeutics for use in viral  
351 infections, autoimmune and inflammatory diseases and cancer.

352

## 353 Materials and Methods

### 354 [Plasmids, protein expression constructs and cell Lines](#)

355 All constructs were created by a traditional restriction ligation approach. Restriction enzymes, T4 ligase  
356 and Q5 polymerase were purchased from NEB (New England Biolabs, Ipswich, Massachusetts, USA). All  
357 primers were purchased from IDT (Integrated DNA Technologies, Leuven, Belgium). Recombinant DNA was  
358 purchased from GenScript (GenScript, Piscataway, New Jersey, USA). The mature sequence of human IL-18  
359 (residues 37-193, UniProt ID: Q14116) was codon optimized for expression in *E. coli* and purchased in the  
360 pUC57 vector from GenScript (GenScript, Piscataway, New Jersey, USA). The sequence was cloned into the  
361 pET42a plasmid (Cat No 70561, Novagen, Merck, Overijse, Belgium) in frame with an N-terminal caspase3-  
362 cleavable glutathione S-transferase (GST)-tag (26). The introduction of an extra N-terminal hexahistidine  
363 (His<sub>6</sub>)-tag was performed by polymerase chain reaction (PCR). The sequence of human IL-18BP (residues 1-  
364 194, UniProt ID: O95998) was purchased in the pUC57 vector at GenScript (GenScript, Piscataway, New  
365 Jersey, USA). The sequence was cloned in frame with a C-terminal caspase3 site followed by an AviTag and  
366 a His<sub>6</sub> tag. The construct was further cloned in frame with an N-terminal chicken RTP $\mu$ -like signal peptide  
367 sequence (67) that replaced the native signal peptide sequence (residues 1-30). For crystallization  
368 purposes, the N-terminus (residues 31-60) was removed by PCR (IL-18BP $\Delta$ N $\Delta$ N) and the construct was cloned  
369 in the same pHLSec plasmid containing an N-terminal chicken RTP $\mu$ -like signal peptide sequence and a  
370 caspase 3 cleavable Avi-His<sub>6</sub>-tag. All constructs were validated by Sanger sequencing by GATC BioTech  
371 (Konstanz, Germany) before further experiments were performed.

### 372 [Expression and purification of recombinant Proteins](#)

373 BL21(DE3) *E. coli* transformed with plasmid pET42 expressing N-terminally GST- and HIS-tagged human  
374 IL-18 were grown at 37°C in Lysogeny broth (LB) medium containing kanamycin (25  $\mu$ g/ml) as selection  
375 marker for the pET42a plasmid (Cat No 70561, Novagen, Merck, Overijse, Belgium). When the optical  
376 density at 600 nm (OD<sub>600</sub>) reached 0.6, the expression of human IL-18 was induced by addition of  
377 isopropyl- $\beta$ -D-thiogalactopyranoside (IPTG) at a final concentration of 1 mM, after which the culture was

378 incubated at 28°C for 5 hours. The bacteria were harvested by centrifugation (7,000 × g for 10 min at 4°C)  
379 and the cellular pellet was stored at -80°C. The bacterial pellet was thawed and resuspended in HEPES  
380 buffered saline (HBS, 20 mM HEPES, 150 mM NaCl, pH 7.4) with DNaseI (REF 10104159001, Roche  
381 Diagnostics, Vilvoorde, Belgium). The cells were lysed by sonication with a Qsonica macrotip sonicator  
382 (Newtown, Connecticut, USA) (on-time 4 min; pulse on 30 sec; pulse off 30 sec; amplitude 70%) while  
383 cooled on ice. The lysate was clarified by centrifugation (20,000 × g for 45 min at 4°C) and filtration using a  
384 0.22-µm Millipore™ Steritop™ Sterile Vacuum Bottle-Top Filter (Thermo Fisher Scientific, Merelbeke,  
385 Belgium), and loaded onto a HisTrap™ HP 5 ml column (GE Healthcare, Diegem, Belgium) equilibrated with  
386 HBS. The column was washed (HBS, 50 mM imidazole) before eluting the protein (HBS, 250 mM imidazole)  
387 following desalting using a HiPrep™ 26/10 Desalting column (GE Healthcare, Diegem, Belgium) to remove  
388 imidazole. The His<sub>6</sub>-GST-tag was removed by caspase 3 (produced in-house) cleavage at 37°C for 1 hour. To  
389 remove the uncleaved protein and the His<sub>6</sub>-GST-tag, the sample was again loaded onto a HisTrap™ HP 5  
390 ml column (GE Healthcare, Diegem, Belgium). The flow-through was collected and concentrated before  
391 injection onto a HiLoad® 16/600 Superdex® 75 pg column (GE Healthcare Diegem, Belgium) using HBS as  
392 running buffer. Fractions containing human IL-18 were pooled, flash frozen and stored at -80°C. The purity  
393 of the protein was evaluated on SDS-PAGE stained with Coomassie blue.

394

#### 395 [Expression and purification of recombinant human IL-18BP](#)

396 Adherent HEK293S MGAT1<sup>-/-</sup> cells (68) were grown in 5-layer cell culture flasks (Falcon® Multi-Flask,  
397 Corning, New York, USA) in Dulbecco's Modified Eagle Medium (DMEM) (Gibco™, Life Technologies,  
398 Thermo Fisher Scientific, Merelbeke, Belgium) supplemented with 10% Fetal Calf Serum (FCS) (Bodinco,  
399 Alkmaar, Netherlands). Upon transfection, the growth medium was exchanged for DMEM supplemented  
400 with 3.6 mM valproic acid (item 13033, Cayman Chemical Company Europe, Tallinn, Estonia). Transient  
401 expression of human IL-18BP or IL-18BP<sub>ΔNΔN</sub> was achieved using branched polyethyleneimine (PEI)  
402 (Mn ~ 10 000, Cat.:40,872-7, Sigma-Aldrich, Diegem, Belgium) as transfection reagent (67). After 4 days of  
403 expression, filtered conditioned medium was loaded onto a 5 ml cComplete™ His-tag Purification Column  
404 (Roche Diagnostics, Vilvoorde, Belgium). The protein was eluted with 250 mM imidazole in HBS after which  
405 the imidazole was removed using a HiPrep™ 26/10 Desalting column (GE Healthcare, Diegem, Belgium).  
406 The Avi-His<sub>6</sub>-tag was cleaved by caspase-3 (produced in-house) and the glycans were trimmed by EndoH

407 (produced in-house) at 37°C for 1 hour. The flow-through of the HisTrap™ HP 5 ml column (GE Healthcare,  
408 Diegem, Belgium) containing the cleaved protein was collected, concentrated and injected onto a HiLoad®  
409 16/600 Superdex® 200 pg column (GE Healthcare Life Sciences) using HBS as running buffer. Fractions  
410 containing human IL-18BP or IL-18BP<sub>ΔNΔN</sub> were pooled, flash frozen and stored at -80°C. The purity of the  
411 protein was evaluated on SDS-PAGE stained with Coomassie.

#### 412 [Multi-Angle Laser Light Scattering](#)

413 Purified protein samples at a concentration of 0.5 mg ml<sup>-1</sup> were injected onto a Superdex Increase  
414 10/300 GL column (GE Healthcare, Diegem, Belgium) that was pre-equilibrated with HBS. The column was  
415 coupled in line with a UV-detector (Shimadzu, Brussels, Belgium), a miniDAWN TREOS multi-angle laser  
416 light scattering (MALLS) detector (Wyatt, Santa Barbara, California, USA) and an Optilab T-rEX  
417 refractometer (Wyatt, Santa Barbara, California, USA). Refractive index (RI) increment values (dn/dc) of  
418 0.185 ml g<sup>-1</sup> and 0.155 ml g<sup>-1</sup> were used for protein and glycan analysis, respectively. Bovine serum albumin  
419 (BSA) (Pierce, Merelbeke, Belgium) was used as standard to correct for band broadening. The resulting data  
420 was analyzed using the ASTRA6.1 software (Wyatt, v6.1) and errors were calculated in Microsoft Excel.

#### 421 [Isothermal Titration Calorimetry](#)

422 All proteins were buffer matched in HBS from the same batch using size exclusion chromatography and  
423 all the solutions were degassed. Protein concentrations were determined with the NanoDrop™ 2000  
424 (Thermo Fisher Scientific, Merelbeke, Belgium) using their corresponding extinction coefficients  
425 (absorbance of 1%). Experiments were carried out on the MicroCal VP-ITC calorimeter (Malvern Panalytical,  
426 Malvern, United Kingdom) at 37°C. Titrations were always preceded by an initial injection of 3 μl, and were  
427 carried out using 10 μl injections applied 300 s apart. The sample was stirred at a speed of 300 r.p.m.  
428 throughout. The data was recorded using the Origin® scientific plotting software (Version 7.0, MicroCal,  
429 Malvern Panalytical, Malvern, United Kingdom) and further analyzed using NITPIC (69) and SEDPHAT (70)  
430 fitting the data with a “one to one” binding model.

#### 431 [Bioactivity assays](#)

432 KG-1 cells were cultured in RPMI media (Gibco) supplemented with 10 % fetal calf serum (Bodinco).  
433 Cells were cultured at 37°C in a humidified atmosphere with 5 % CO<sub>2</sub>. KG-1 cells were plated at 2 x 10<sup>5</sup> cells  
434 per well in 24-well plates. Recombinant IL-18 was pre-incubated with IL-18BP<sub>FL</sub>, IL-18BP<sub>ΔN-EH</sub> or complexes  
435 thereof as indicated, for 1 h at 37 °C. KG-1 cells were left untreated or stimulated with IL-18 (0.5 nM final

436 concentration) +/- IL-18BP, as indicated. Cells were incubated with stimuli for 18 h and cell culture  
437 supernatants were subsequently collected. Culture supernatants were centrifuged for 5 minutes at 1000 g  
438 to remove cells and frozen at -80°C.

#### 439 [Detection of cytokines by ELISA](#)

440 Human IL-8 was measured from cell culture supernatants using commercially available specific paired  
441 ELISA kits (R&D Systems). Briefly, a 96 well plate was coated with 50 ml of capture antibody per well  
442 according to manufacturer's instructions, and incubated overnight at room temperature. Wells were  
443 washed three times with 150 ml wash buffer (0.05% Tween-20 in PBS, pH 7.2), then blocked for 1 h in  
444 reagent diluent (1% BSA in PBS, pH 7.2). Samples were diluted as required in reagent diluent and 50 ml of  
445 each sample was added to wells and incubated for 2 h at room temperature. Appropriate standards were  
446 prepared for each ELISA assay according to manufacturer's instructions. Wells were washed again three  
447 times, followed by 50 ml of biotin-conjugated detection antibody incubated for 2 h. Wells were washed  
448 three times and 50 ml streptavidin-HRP was added to wells and incubated for 30 minutes in the dark.  
449 Finally, wells were washed three times, followed by addition of 50 ml TMB substrate solution. The reaction  
450 was stopped with 30 ml of 2M sulfuric acid and absorbance was read at 450 nm on an ELISA plate reader  
451 (Fluostar). All cytokine assays were carried out using triplicate samples from each culture.

#### 452 [Bioinformatic analyses](#)

453 All sequence alignments were performed by Clustal Omega (71). Structural alignments were performed in  
454 Swiss-PdbViewer (72). Glycan prediction were performed using NetNGlyc (73) and NetOGlyc servers (74).  
455 Protein disorder was predicted using IUPred (75). Sequence alignments were visualized by ESPript (76).  
456 Protein structures were visualized in PyMOL (77, 78). Interaction interface was inferred using the PISA  
457 server (79).

#### 458 [Crystal structure determination and refinement](#)

459 During the purification of IL-18BP<sub>ΔN</sub>, purified IL-18 was added in a 1:2 ratio prior to caspase 3 and Endo  
460 H digests. The complex was purified via SEC and concentrated to 35 mgml<sup>-1</sup>. Sitting-drop vapor diffusion  
461 experiments were set up in Swisisci 96-well triple drop plates (Molecular dimensions, Suffolk, United  
462 Kingdom) with commercial sparse matrix crystallization screens. Using a Mosquito<sup>®</sup> liquid handling robot  
463 (TTP Labtech, Hertfordshire, United Kingdom), the protein was mixed with mother liquor in a 1:1 ratio in a  
464 final volume of 200 nl. The plates were incubated at 20°C. An initial hit in the Crystal Screen (Cat No HR2-

465 110, Hampton Research, Aliso Viejo, California, USA) in condition D10 (0.2 M Calcium acetate hydrate, 0.1  
466 M Sodium cacodylate trihydrate pH 6.5, 18% w/v Polyethylene glycol 8000) was optimized by varying pH  
467 (6.2-7.1) and PEG concentration (12%-27%). Crystals obtained from the optimization screen were used for  
468 seeding new plates, finally yielding single crystals. These crystals were cryoprotected in mother liquor  
469 supplemented with 20% glucose prior to cryo-cooling in liquid nitrogen. Diffraction data was initially  
470 collected under cryogenic conditions at a synchrotron radiation source, namely beamline PETRA III in  
471 Hamburg.

472 The diffraction data were integrated using XDS (80) and were treated for anisotropy using the  
473 STARANISO server (55). Initial phases were determined by maximum-likelihood molecular replacement in  
474 PHASER (81) using a search model derived from the structure of hIL-18 in complex with ectvIL-18BP (pdb  
475 3f62). Iterative cycles of structure building and refinement were performed in COOT (82) and PHENIX.refine  
476 (83) respectively.

477 Structure coordinates and structure factors for the human IL-18:IL18BP complex have been deposited in  
478 the Protein Data Bank (PDB) under accession code 7al7.

#### 479 **Acknowledgements**

480 We thank AB2 Bio Ltd. (Lausanne, Switzerland) for clinical grade recombinant IL-18BP and Prof. Seamus  
481 Martin, Trinity College (Dublin, Ireland), for providing KG-1 cells. J.A., Y.B. and D.C. are research fellows of  
482 Research Foundation Flanders (FWO), Belgium. This project has received funding from the European  
483 Union's Horizon 2020 research and innovation program under grant agreement No 779295.

#### 485 **Author Contributions**

486 S.D. and J.A. carried out recombinant protein production and purification, biophysical studies, and  
487 structural studies with contributions from S.N.S. D.C. carried out bioactivity assays. Y.B. provided input on  
488 the generation of the glyco-engineered hIL-18BP variant. A.S., E.J.S., and C.G. provided initial research  
489 materials. S.D., J.A., D.C. and S.N.S. wrote the manuscript with contributions from all authors. S.N.S.  
490 conceived and supervised the project.

#### 493 **References**

- 494 1. H. Okamura, K. Kawaguchi, K. Shoji, Y. Kawade, High-level induction of gamma interferon with  
495 various mitogens in mice pretreated with *Propionibacterium acnes*. *Infect Immun* **38**, 440–443  
496 (1982).
- 497 2. M. Wada, H. Okamura, K. Nagata, T. Shimoyama, Y. Kawade, Cellular mechanisms in in vivo  
498 production of gamma interferon induced by lipopolysaccharide in mice infected with  
499 *Mycobacterium bovis* BCG. *J. Interferon Res.* **5**, 431–443 (1985).

- 500 3. K. Nakamura, H. Okamura, M. Wada, K. Nagata, T. Tamura, Endotoxin-induced serum factor that  
501 stimulates gamma interferon production. *Infect Immun* **57**, 590–595 (1989).
- 502 4. S. Ushio, *et al.*, Cloning of the cDNA for human IFN-gamma-inducing factor, expression in  
503 *Escherichia coli*, and studies on the biologic activities of the protein. *J. Immunol.* **156**, 4274–4279  
504 (1996).
- 505 5. T. Ghayur, *et al.*, Caspase-1 processes IFN-gamma-inducing factor and regulates LPS-induced IFN-  
506 gamma production. *Nature* **386**, 619–623 (1997).
- 507 6. Y. Gu, *et al.*, Activation of interferon-gamma inducing factor mediated by interleukin-1beta  
508 converting enzyme. *Science (80-. )*. **275**, 206–209 (1997).
- 509 7. C. A. Dinarello, Overview of the IL-1 family in innate inflammation and acquired immunity.  
510 *Immunol. Rev.* **281**, 8–27 (2018).
- 511 8. I. S. Afonina, C. Müller, S. J. Martin, R. Beyaert, Proteolytic Processing of Interleukin-1 Family  
512 Cytokines: Variations on a Common Theme. *Immunity* **42**, 991–1004 (2015).
- 513 9. R. Medzhitov, *et al.*, MyD88 is an adaptor protein in the hToll/IL-1 receptor family signaling  
514 pathways. *Mol. Cell* **2**, 253–258 (1998).
- 515 10. H. Wesche, W. J. Henzel, W. Shillinglaw, S. Li, Z. Cao, MyD88: An adapter that recruits IRAK to the  
516 IL-1 receptor complex. *Immunity* **7**, 837–847 (1997).
- 517 11. Z. Cao, J. Xiong, M. Takeuchi, T. Kurama, D. V. Goeddel, TRAF6 is a signal transducer for  
518 interleukin-1. *Nature* **383**, 443–446 (1996).
- 519 12. A. Weber, P. Wasiliew, M. Kracht, Interleukin-1 $\beta$  (IL-1 $\beta$ ) processing pathway. *Sci. Signal.* **3**, cm2–  
520 cm2 (2010).
- 521 13. C. A. Dinarello, Interleukin-18. *Methods* **19**, 121–132 (1999).
- 522 14. C. A. Dinarello, D. Novick, S. Kim, G. Kaplanski, Interleukin-18 and IL-18 binding protein. *Front.*  
523 *Immunol.* **4**, 289 (2013).
- 524 15. M. Tone, S. A. Thompson, Y. Tone, P. J. Fairchild, H. Waldmann, Regulation of IL-18 (IFN-gamma-  
525 inducing factor) gene expression. *J. Immunol.* **159**, 6156–6163 (1997).
- 526 16. A. Mantovani, C. A. Dinarello, M. Molgora, C. Garlanda, Interleukin-1 and Related Cytokines in the  
527 Regulation of Inflammation and Immunity. *Immunity* **50**, 778–795 (2019).
- 528 17. D. Novick, *et al.*, Interleukin-18 Binding Protein: A Novel Modulator of the Th1 Cytokine Response.  
529 *Immunity* **10**, 127–136 (1999).
- 530 18. D. Novick, S. Kim, G. Kaplanski, C. A. Dinarello, Interleukin-18, more than a Th1 cytokine. *Semin.*  
531 *Immunol.* **25**, 439–448 (2013).
- 532 19. J. Felix, S. N. Savvides, Mechanisms of immunomodulation by mammalian and viral decoy  
533 receptors: insights from structures. *Nat. Rev. Immunol.* **17**, 112–129 (2017).
- 534 20. Y. Xiang, B. Moss, IL-18 binding and inhibition of interferon gamma induction by human poxvirus-  
535 encoded proteins. *Proc. Natl. Acad. Sci. U. S. A.* **96**, 11537–42 (1999).
- 536 21. T. L. Born, *et al.*, A Poxvirus Protein That Binds to and Inactivates IL-18, and Inhibits NK Cell  
537 Response. *J. Immunol.* **164**, 3246–3254 (2000).
- 538 22. B. Krumm, X. Meng, Y. Li, Y. Xiang, J. Deng, Structural basis for antagonism of human interleukin 18  
539 by poxvirus interleukin 18-binding protein. *Proc. Natl. Acad. Sci.* **105**, 20711–20715 (2008).
- 540 23. B. Krumm, X. Meng, Z. Wang, Y. Xiang, J. Deng, A unique bivalent binding and inhibition  
541 mechanism by the yatapoxvirus interleukin 18 binding protein. *PLoS Pathog* **8**, e1002876 (2012).
- 542 24. D. Novick, *et al.*, A novel IL-18BP ELISA shows elevated serum IL-18BP in sepsis and extensive  
543 decrease of free IL-18. *Cytokine* **14**, 334–342 (2001).
- 544 25. S. Calderara, Y. Xiang, B. Moss, Orthopoxvirus IL-18 binding proteins: Affinities and antagonist  
545 activities. *Virology* **279**, 22–26 (2001).

- 546 26. N. Tsutsumi, *et al.*, The structural basis for receptor recognition of human interleukin-18. *Nat.*  
547 *Commun.* **5**, 5340 (2014).
- 548 27. H. Mühl, *et al.*, Interferon- $\gamma$  Mediates Gene Expression of IL-18 Binding Protein in Nonleukocytic  
549 Cells. *Biochem. Biophys. Res. Commun.* **267**, 960–963 (2000).
- 550 28. M. Harel, C. Girard-Guyonvarc’h, E. Rodriguez, G. Palmer, C. Gabay, Production of IL-18 Binding  
551 Protein by Radiosensitive and Radioresistant Cells in CpG-Induced Macrophage Activation  
552 Syndrome. *J. Immunol.* **205**, 1167–1175 (2020).
- 553 29. M. Yamamura, *et al.*, Interferon- $\gamma$ -inducing activity of interleukin-18 in the joint with rheumatoid  
554 arthritis. *Arthritis Rheum.* **44**, 275–285 (2001).
- 555 30. M. Tanaka, *et al.*, Mature form of interleukin 18 is expressed in rheumatoid arthritis synovial tissue  
556 and contributes to interferon-gamma production by synovial T cells. *J. Rheumatol.* **28**, 1779–1787  
557 (2001).
- 558 31. G. Monteleone, *et al.*, Bioactive IL-18 expression is up-regulated in Crohn’s disease. *J. Immunol.*  
559 **163**, 143–147 (1999).
- 560 32. T. T. Pizarro, *et al.*, IL-18, a novel immunoregulatory cytokine, is up-regulated in Crohn’s disease:  
561 expression and localization in intestinal mucosal cells. *J. Immunol.* **162**, 6829–6835 (1999).
- 562 33. A. Csiszár, G. Nagy, P. Gergely, T. Pozsonyi, E. Pócsik, Increased interferon-gamma (IFN-gamma),  
563 IL-10 and decreased IL-4 mRNA expression in peripheral blood mononuclear cells (PBMC) from  
564 patients with systemic lupus erythematosus (SLE). *Clin. Exp. Immunol.* **122**, 464–470 (2000).
- 565 34. C. K. Wong, E. K. Li, C. Y. Ho, C. W. Lam, Elevation of plasma interleukin-18 concentration is  
566 correlated with disease activity in systemic lupus erythematosus. *Rheumatol.* **39**, 1078–1081  
567 (2000).
- 568 35. D. Novick, *et al.*, High circulating levels of free interleukin-18 in patients with active SLE in the  
569 presence of elevated levels of interleukin-18 binding protein. *J. Autoimmun.* **34**, 121–126 (2010).
- 570 36. C. Girard, *et al.*, Elevated serum levels of free interleukin-18 in adult-onset Still’s disease.  
571 *Rheumatol. (United Kingdom)* **55**, 2237–2247 (2016).
- 572 37. J. J. Rodriguez-Smith, *et al.*, Inflammatory biomarkers in COVID-19-associated multisystem  
573 inflammatory syndrome in children, Kawasaki disease, and macrophage activation syndrome: a  
574 cohort study. *Lancet Rheumatol.* **3**, e574–e584 (2021).
- 575 38. C. Lucas, *et al.*, Longitudinal analyses reveal immunological misfiring in severe COVID-19. *Nature*  
576 **584**, 463–469 (2020).
- 577 39. W. Huang, *et al.*, The Inflammatory Factors Associated with Disease Severity to Predict COVID-19  
578 Progression. *J. Immunol.* **206**, 1597–1608 (2021).
- 579 40. H. Flament, *et al.*, Outcome of SARS-CoV-2 infection is linked to MAIT cell activation and  
580 cytotoxicity. *Nat. Immunol.* **22**, 322–335 (2021).
- 581 41. D. N. Clark, J. L. Markham, C. S. Sloan, B. D. Poole, Cytokine inhibition as a strategy for treating  
582 systemic lupus erythematosus. *Clin. Immunol.* **148**, 335–343 (2013).
- 583 42. T. Ten Hove, *et al.*, Blockade of endogenous IL-18 ameliorates TNBS-induced colitis by decreasing  
584 local TNF-alpha production in mice. *Gastroenterology* **121**, 1372–1379 (2001).
- 585 43. C. Gabay, *et al.*, Open-label, multicentre, dose-escalating phase II clinical trial on the safety and  
586 efficacy of tadekinig alfa (IL-18BP) in adult-onset Still’s disease. *Ann. Rheum. Dis.* **77**, annrhumdis-  
587 2017-212608 (2018).
- 588 44. P. P. Tak, M. Bacchi, M. Bertolino, Pharmacokinetics of IL-18 binding protein in healthy volunteers  
589 and subjects with rheumatoid arthritis or plaque psoriasis. *Eur. J. Drug Metab. Pharmacokinet.* **31**,  
590 109–116 (2006).
- 591 45. Z. Ma, *et al.*, Augmentation of immune checkpoint cancer immunotherapy with IL18. *Clin. Cancer*



- 592 *Res.* **22**, 2969–2980 (2016).
- 593 46. M. J. Robertson, *et al.*, Clinical and biological effects of recombinant human interleukin-18  
594 administered by intravenous infusion to patients with advanced cancer. *Clin. Cancer Res.* **12**,  
595 4265–4273 (2006).
- 596 47. A. A. Tarhini, *et al.*, A phase 2, randomized study of SB-485232, rhIL-18, in patients with previously  
597 untreated metastatic melanoma. *Cancer* **115**, 859–868 (2009).
- 598 48. M. J. Robertson, *et al.*, A dose-escalation study of recombinant human Interleukin-18 using two  
599 different schedules of administration in patients with cancer. *Clin. Cancer Res.* **14**, 3462–3469  
600 (2008).
- 601 49. P. J. Reeves, R. L. Thurmond, H. G. Khorana, Structure and function in rhodopsin: high level  
602 expression of a synthetic bovine opsin gene and its mutants in stable mammalian cell lines. *Proc.*  
603 *Natl. Acad. Sci. U. S. A.* **93**, 11487–92 (1996).
- 604 50. J. Elegheert, *et al.*, Allosteric competitive inactivation of hematopoietic CSF-1 signaling by the viral  
605 decoy receptor BАРF1. *Nat. Struct. Mol. Biol.* **19**, 938–47 (2012).
- 606 51. J. Felix, *et al.*, Structure and Assembly Mechanism of the Signaling Complex Mediated by Human  
607 CSF-1. *Structure* **23**, 1621–31 (2015).
- 608 52. Y. Bloch, *et al.*, Structural Activation of Pro-inflammatory Human Cytokine IL-23 by Cognate IL-23  
609 Receptor Enables Recruitment of the Shared Receptor IL-12R $\beta$ 1. *Immunity* **48**, 45-58.e6 (2018).
- 610 53. J. Felix, *et al.*, Structural basis of GM-CSF and IL-2 sequestration by the viral decoy receptor GIF.  
611 *Nat. Commun.* **7**, 13228 (2016).
- 612 54. K. Fukushima, Y. Ikehara, K. Yamashita, Functional role played by the glycosylphosphatidylinositol  
613 anchor glycan of CD48 in interleukin-18-induced interferon- $\gamma$  production. *J. Biol. Chem.* **280**,  
614 18056–18062 (2005).
- 615 55. I. J. Tickle, *et al.*, STARANISO (2018).
- 616 56. Z. Kato, *et al.*, The structure and binding mode of interleukin-18. *Nat. Struct. Biol.* **10**, 966–971  
617 (2003).
- 618 57. Y. Xiang, B. Moss, Determination of the Functional Epitopes of Human Interleukin-18-binding  
619 Protein by Site-directed Mutagenesis. *J. Biol. Chem.* **276**, 17380–17386 (2001).
- 620 58. S. H. Kim, *et al.*, Structural requirements of six naturally occurring isoforms of the IL-18 binding  
621 protein to inhibit IL-18. *Proc. Natl. Acad. Sci. U. S. A.* **97**, 1190–1195 (2000).
- 622 59. S. H. Kim, *et al.*, Identification of amino acid residues critical for biological activity in human  
623 interleukin-18. *J. Biol. Chem.* **277**, 10998–11003 (2002).
- 624 60. G. A, *et al.*, IL-18 mediates sickle cell cardiomyopathy and ventricular arrhythmias. *Blood* **137**,  
625 1208–1218 (2021).
- 626 61. L. Au, *et al.*, Cytokine release syndrome in a patient with colorectal cancer after vaccination with  
627 BNT162b2. *Nat. Med.* (2021) <https://doi.org/10.1038/s41591-021-01387-6>.
- 628 62. R. Karki, *et al.*, Synergism of TNF- $\alpha$  and IFN- $\gamma$  Triggers Inflammatory Cell Death, Tissue Damage,  
629 and Mortality in SARS-CoV-2 Infection and Cytokine Shock Syndromes. *Cell* **184**, 149-168.e17  
630 (2021).
- 631 63. G. J, *et al.*, Longitudinal proteomic profiling of dialysis patients with COVID-19 reveals markers of  
632 severity and predictors of death. *Elife* **10** (2021).
- 633 64. A. Vecchié, *et al.*, IL-18 and infections: Is there a role for targeted therapies? *J. Cell. Physiol.* **236**,  
634 1638–1657 (2021).
- 635 65. J. Y, *et al.*, Should we stimulate or suppress immune responses in COVID-19? Cytokine and anti-  
636 cytokine interventions. *Autoimmun. Rev.* **19** (2020).
- 637 66. T. Zhou, *et al.*, IL-18BP is a secreted immune checkpoint and barrier to IL-18 immunotherapy.

- 638 *Nature* **583**, 609–614 (2020).
- 639 67. A. R. Aricescu, W. Lu, E. Y. Jones, A time- and cost-efficient system for high-level protein  
640 production in mammalian cells. *Acta Crystallogr. D. Biol. Crystallogr.* **62**, 1243–50 (2006).
- 641 68. P. J. Reeves, N. Callewaert, R. Contreras, H. G. Khorana, Structure and function in rhodopsin : High-  
642 level expression of rhodopsin with restricted and homogeneous N-glycosylation by a tetracycline-  
643 HEK293S stable mammalian cell line (2002).
- 644 69. T. H. Scheuermann, High-precision, automated integration of multiple isothermal titration  
645 calorimetric thermograms: New features of NITPIC. *Methods* **76**, 87–98 (2015).
- 646 70. G. Piszczek, SEDPHAT – A platform for global ITC analysis and global multi-method analysis of  
647 molecular interactions. *Methods* **76**, 137–148 (2015).
- 648 71. F. Madeira, *et al.*, The EMBL-EBI search and sequence analysis tools APIs in 2019. *Nucleic Acids*  
649 *Res.* **47**, W636–W641 (2019).
- 650 72. N. Guex, M. C. Peitsch, SWISS-MODEL and the Swiss-Pdb Viewer: An environment for comparative  
651 protein modeling. *Electrophoresis* **18**, 2714–2723 (1997).
- 652 73. E. J. R. Gupta, S. Brunak, Prediction of N-glycosylation sites in human proteins (2004).
- 653 74. C. Steentoft, *et al.*, Precision mapping of the human O-GalNAc glycoproteome through SimpleCell  
654 technology. *EMBO J.* **32**, 1478–1488 (2013).
- 655 75. Z. Dosztanyi, V. Csizmok, P. Tompa, I. Simon, IUPred: web server for the prediction of intrinsically  
656 unstructured regions of proteins based on estimated energy content. *Bioinformatics* **21**, 3433–  
657 3434 (2005).
- 658 76. X. Robert, P. Gouet, Deciphering key features in protein structures with the new ENDscript server.  
659 *Nucleic Acids Res.* **42**, W320–W324 (2014).
- 660 77. W. L. DeLano, The PyMOL Molecular Graphics System. *Schrödinger LLC www.pymol.org Version 1.*,  
661 <http://www.pymol.org> (2002).
- 662 78. L. Schrödinger, “The PyMOL Molecular Graphics System, Version~1.8” (2015).
- 663 79. E. Krissinel, K. Henrick, Inference of Macromolecular Assemblies from Crystalline State. *J. Mol. Biol.*  
664 **372**, 774–797 (2007).
- 665 80. W. Kabsch, IUCr, XDS. *Acta Crystallogr. Sect. D Biol. Crystallogr.* **66**, 125–132 (2010).
- 666 81. A. J. McCoy, *et al.*, Phaser crystallographic software. *J. Appl. Crystallogr.* **40**, 658–674 (2007).
- 667 82. P. Emsley, B. Lohkamp, W. G. Scott, K. Cowtan, IUCr, Features and development of Coot. *Acta*  
668 *Crystallogr. Sect. D Biol. Crystallogr.* **66**, 486–501 (2010).
- 669 83. P. D. Adams, *et al.*, PHENIX: a comprehensive Python-based system for macromolecular structure  
670 solution. *Acta Crystallogr. Sect. D Biol. Crystallogr.* **66**, 213–221 (2010).
- 671 84. D. J. Esteban, R. M. L. M. L. Buller, Identification of residues in an orthopoxvirus interleukin-18  
672 binding protein involved in ligand binding and species specificity. *Virology* **323**, 197–207 (2004).
- 673 85. S.-H. M. Kim, *et al.*, Site-specific mutations in the mature form of human IL-18 with enhanced  
674 biological activity and decreased neutralization by IL-18 binding protein. *Proc. Natl. Acad. Sci.* **98**,  
675 3304–3309 (2002).

676 **FIGURE 1**  
677

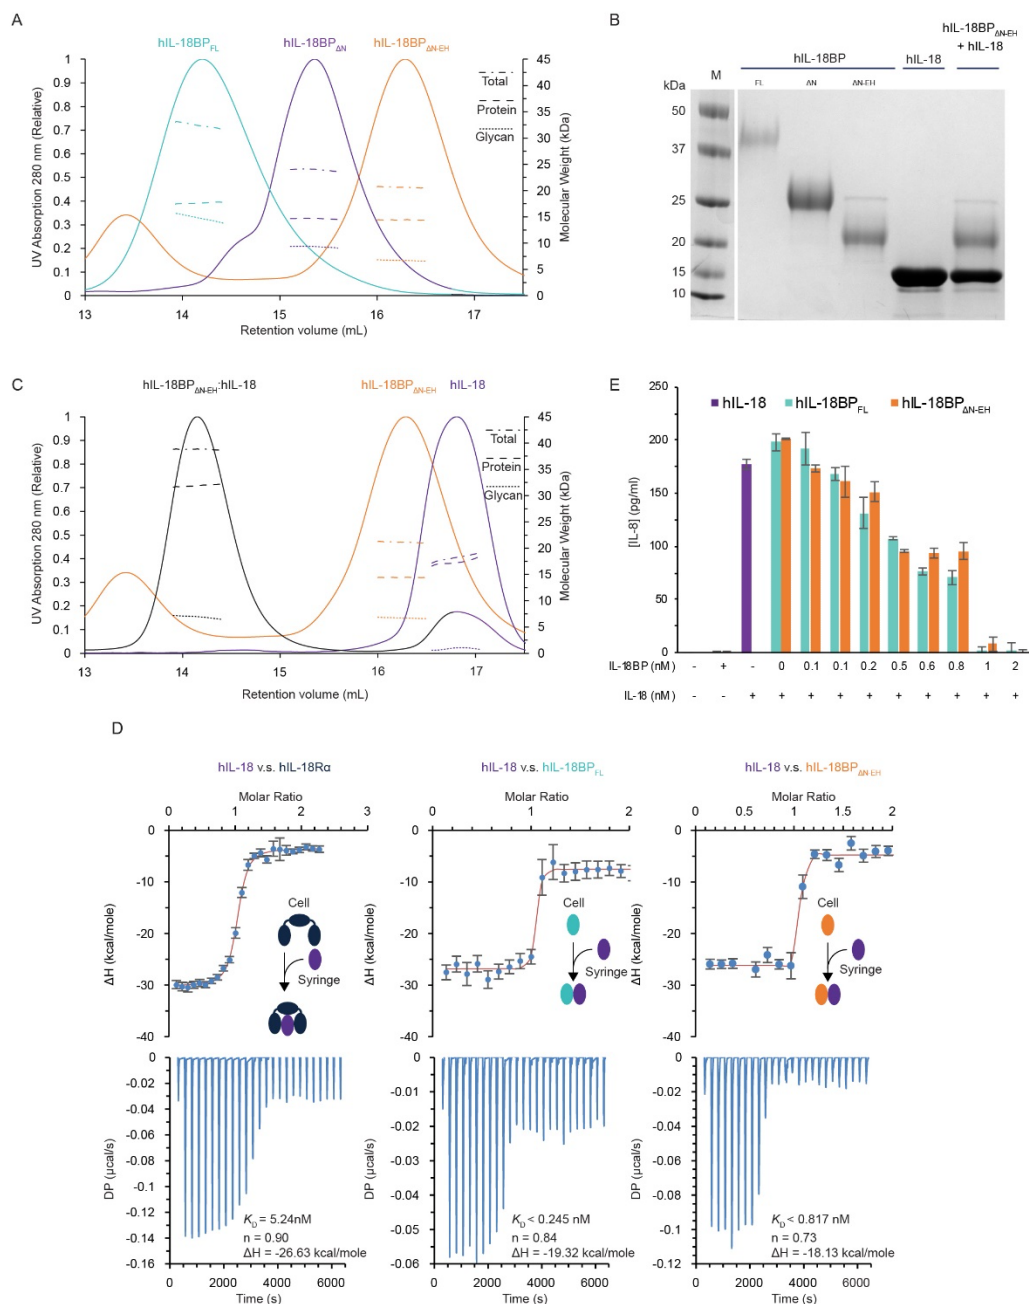

678 **Figure 1. Biochemical characterization and functional activity of human IL-18 and IL-18BP.**

679 **(A)** SEC-MALLS analysis of hIL-18BP<sub>FL</sub>, hIL-18BP<sub>ΔN</sub> and hIL-18BP<sub>ΔN-EH</sub> protein (complex) respectively yielding  
680 less glycosylated and more homogenous material for crystallization purposes

681 **(B)** SDS-PAGE of hIL-18BP<sub>FL</sub>, hIL-18<sub>ΔN</sub> and hIL-18BP<sub>ΔN-EH</sub> show decline in total protein and glycan mass caused  
682 by removal of O-glycosylated N-terminus and shaving of N-glycans by Endoglycosidase H (EH). SDS-PAGE of  
683 hIL-18 and hIL-18:hIL-18BP<sub>ΔN-EH</sub> complex show presence and purity of both proteins.

684 (C) SEC-MALLS analysis of hIL-18:hIL-18BP<sub>ΔN-EH</sub> complex prior to crystallization allow accurate stoichiometry  
685 determination (A) & (C) Full lines show the SEC retention profile of samples (~0.5-1 mg/ml) detected by  
686 UV (left axis, 280 nm). Interrupted lines show the molecular weights in kDa of the sample over the course  
687 of the SEC peak, split up by protein conjugate analysis in total (dashed and dotted), protein (dashed) and  
688 glycan (dotted) mass (right axis).

689 (D) Bar plot of IL-8 levels in conditioned media after hIL-18 stimulation in presence or absence of hIL-18BP<sub>FL</sub>  
690 or IL-18BP<sub>ΔN-EH</sub>. Recombinant IL-18 was pre-incubated for 1 h at 37°C with the indicated concentrations of  
691 full-length IL-18BP or IL-18BP<sub>ΔN-EH</sub>. KG-1 cells were left untreated (UT) or stimulated with IL-18 (purple) (0.5  
692 nM final concentration) +/- IL-18BP (teal and orange), as indicated. After 18 h, IL-8 concentration in cell  
693 culture supernatants was measured by ELISA. Error bars display standard deviation (SEM).

694 (E) Isothermal titration calorimetry (ITC) of hIL-18 in hIL-18R<sub>α</sub>, hIL-18BP<sub>FL</sub> and hIL-18BP<sub>ΔN-EH</sub> shows  
695 recombinantly produced hIL-18 and hIL-18BP<sub>ΔN-EH</sub> are both functionally competent. Bottom plots show the  
696 raw baseline-subtracted thermograms while top plots show integrated heats (blue dots) with fitted  
697 isotherm (red line). Diagrams in the isotherm plot show which protein was in the cell or syringe and what  
698 the expected final complex looks like.

699

700 FIGURE 2

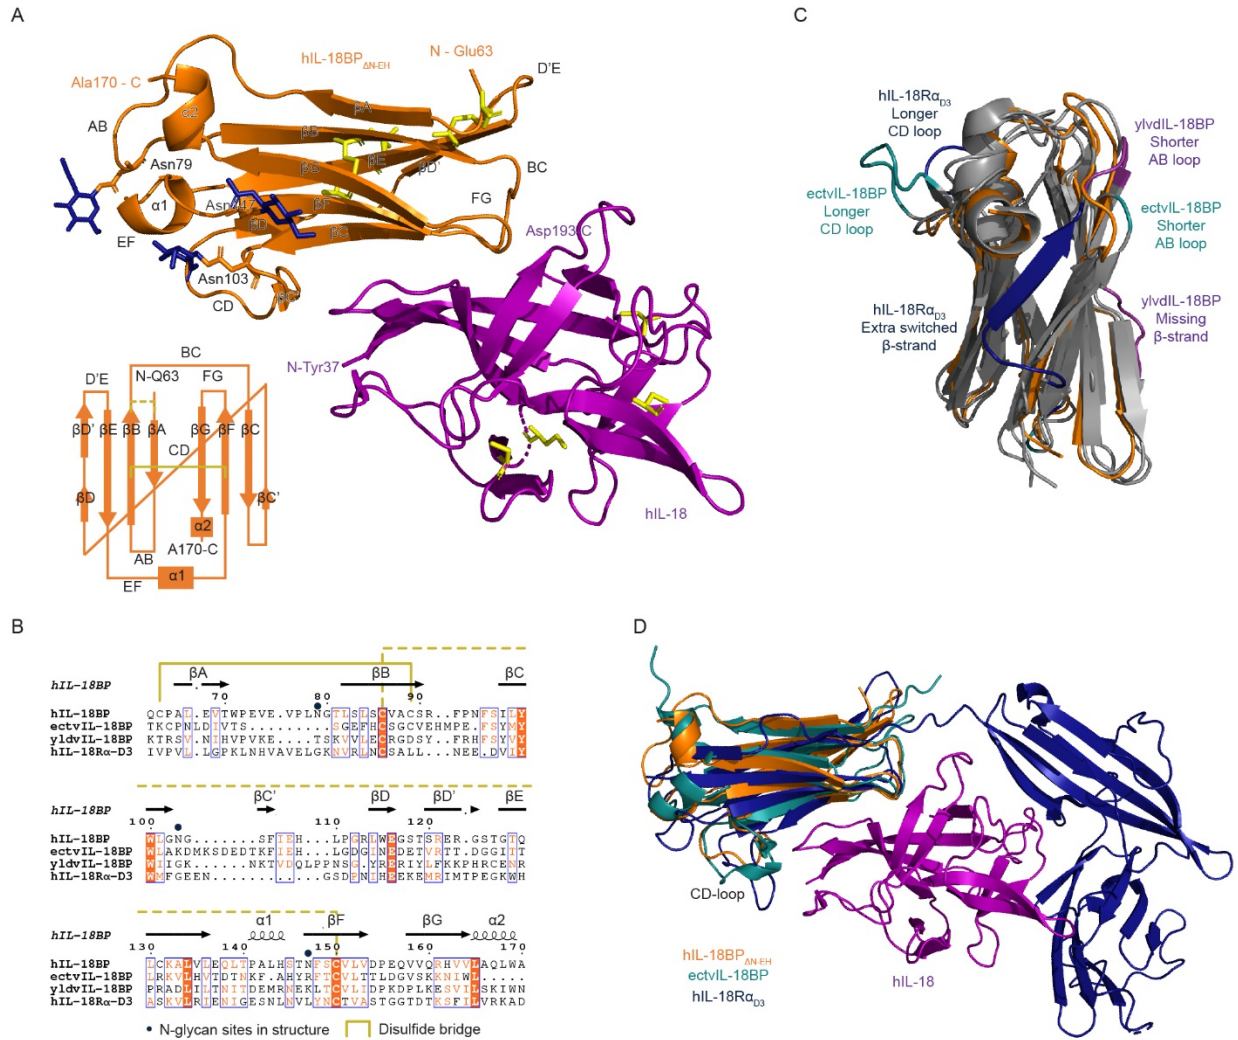

701  
702 **Figure 2. Crystal structure of human IL-18:IL18BP complex and comparisons with human IL-18 receptor and**  
703 **viral decoy receptors.**

704 (A) Cartoon representation of asymmetric unit of the crystal structure of hIL-18:hIL-18BP<sub>ΔN-EH</sub> displaying  
705 hIL-18 (purple) interacting with hIL-18BP<sub>ΔN-EH</sub> (orange). Asparagine residues occupied with GlcNAc (stick,  
706 blue) are shown in stick representation as well as all cysteines (yellow). Secondary structures of hIL-18BP<sub>ΔN-</sub>  
707 <sub>EH</sub>, β-strands, α-helices and loops, are labeled in order of occurrence. Additionally, a schematic of the Ig-  
708 fold of hIL-18BP<sub>ΔN-EH</sub> is shown in the bottom left in which cysteine bridges are represented by yellow lines.  
709 (B) Structural sequence alignment based on existing crystal structures performed in Swiss-PdbViewer (72)  
710 and visualized by ESPrnt (76) shows which residues spatially correspond to each other in the  
711 orthologous structures. Secondary structures are annotated by arrows (β-strand) and coils (α-helices)  
712 above the sequence. Linked disulfides are bridges by yellow lines (full or dashed). Asparagine residues  
713 occupied with GlcNAc in the model are labeled with blue dots. Residues with strict identity have an orange  
714 background, residues with similarity are colored orange. Groups of high similarity residues are surrounded  
715 by a blue box.

716 **(C)** Crystal structure overlay of hIL-18BP<sub>ΔN-EH</sub> (orange, pdb 7a17), ectvIL-18BP (teal, pdb 3f62(22)), yldvIL-  
717 18BP (purple, pdb 4eee(23)) and hIL-18R $\alpha$  (dark blue, pdb 3WO4(26)) aligned to hIL-18BP<sub>ΔN-EH</sub>. Only notable  
718 differences on the level of secondary structures are colored accordingly, while stretches that align to hIL-  
719 18BP<sub>ΔN-EH</sub> are left grey. Structural alignment of these structures shows that the core h-type Ig-fold is  
720 maintained with some strand and loop alterations, with an average all atom RMSD of 2.5 Å. Compared to  
721 human IL-18BP, ectv- and yldvIL-18BP have a shorter AB loop, while ectvIL-18BP has a significantly longer  
722 CD loop.

723 **(D)** Cartoon representation of crystal structures of hIL-18BP<sub>ΔN-EH</sub> (orange, pdb 7a17), ectvIL-18BP (teal, pdb  
724 3f62(22)), yldvIL-18BP (purple, pdb 4eee(23)) and hIL-18R $\alpha$  (dark blue, pdb 3WO4(26)) aligned to hIL-18  
725 (purple, pdb 7a17).

726

727 **Table 1. Crystallographic data collection and refinement statistics.**

728

|                                      | Human IL-18:hIL-18BP <sub>ΔN EH</sub> | Human IL-18:hIL-18BP <sub>ΔN EH</sub><br>Anisotropy Corrected |
|--------------------------------------|---------------------------------------|---------------------------------------------------------------|
| <b>DATA COLLECTION</b>               |                                       |                                                               |
| Wavelength (Å)                       | 0.9762                                | 0.9762                                                        |
| Resolution range (Å)                 | 59.39 - 1.80 (1.87 - 1.80)            | 59.39 - 1.80 (1.85 - 1.80)                                    |
| Space group                          | C 1 2 1                               | C 1 2 1                                                       |
| Unit cell (a, b, c (Å), α, β, γ (°)) | 109.82 44.52 60.28 90 99.86 90        | 109.82 44.52 60.28 90 99.86 90                                |
| Total reflections                    | 183218 (17814)                        | 140440 (6871)                                                 |
| Unique reflections                   | 26507 (2546)                          | 20705 (1035)                                                  |
| Multiplicity                         | 6.9 (7.0)                             | 6.8 (6.6)                                                     |
| Completeness (%)                     | 98.27 (96.15)                         | 77.2 (49.6)                                                   |
| Mean I/σ(I)                          | 15.67 (1.49)                          | 18 (2.9)                                                      |
| Wilson B-factor (Å <sup>2</sup> )    | 36.35                                 | n.a.                                                          |
| R-meas                               | 0.053 (1.327)                         | 0.048 (0.680)                                                 |
| R-pim                                | 0.020 (0.495)                         | 0.018 (0.258)                                                 |
| CC1/2                                | 0.999 (0.896)                         | 0.999 (0.898)                                                 |
| CC*                                  | 1.000 (0.972)                         | n.a.                                                          |
| <b>REFINEMENT (59.39 – 1.8 Å)</b>    |                                       |                                                               |
| Reflections used in refinement       | 26368 (2525)                          | 20691 (1306)                                                  |
| Reflections used for R-free          | 2640 (248)                            | 2062 (130)                                                    |
| R-work/R-free**                      | 0.207 (0.531) / 0.230 (0.586)         | 0.188 (0.264)/ 0.217 (0.320)                                  |
| CC(work)/ CC(free)                   | 0.968 (0.860) / 0.959 (0.812)         | 0.874 (0.689) / 0.858 (0.640)                                 |
| Number of non-hydrogen atoms         | 2309                                  | 2309                                                          |
| macromolecules                       | 2136                                  | 2136                                                          |
| ligands                              | 42                                    | 42                                                            |
| solvent                              | 131                                   | 131                                                           |
| RMS bonds (Å) / angles (°)           | 0.011 / 1.34                          | 0.011 / 1.34                                                  |
| Ramachandran favored (%)             | 98.05                                 | 98.05                                                         |
| Ramachandran allowed (%)             | 1.95                                  | 1.95                                                          |
| Ramachandran outliers (%)            | 0                                     | 0                                                             |
| Rotamer outliers (%)                 | 0                                     | 0                                                             |
| Clashscore                           | 3.48                                  | 3.48                                                          |
| Average B-factor (Å <sup>2</sup> )   | 34.68                                 | 34.68                                                         |
| macromolecules                       | 34.03                                 | 34.03                                                         |
| ligands                              | 66.67                                 | 66.67                                                         |
| solvent                              | 35.15                                 | 35.15                                                         |

729 Values in parentheses correspond to the highest resolution shell (1.87 - 1.80).

730 \*\*10% of reflections in R-free set

731 FIGURE 3

A

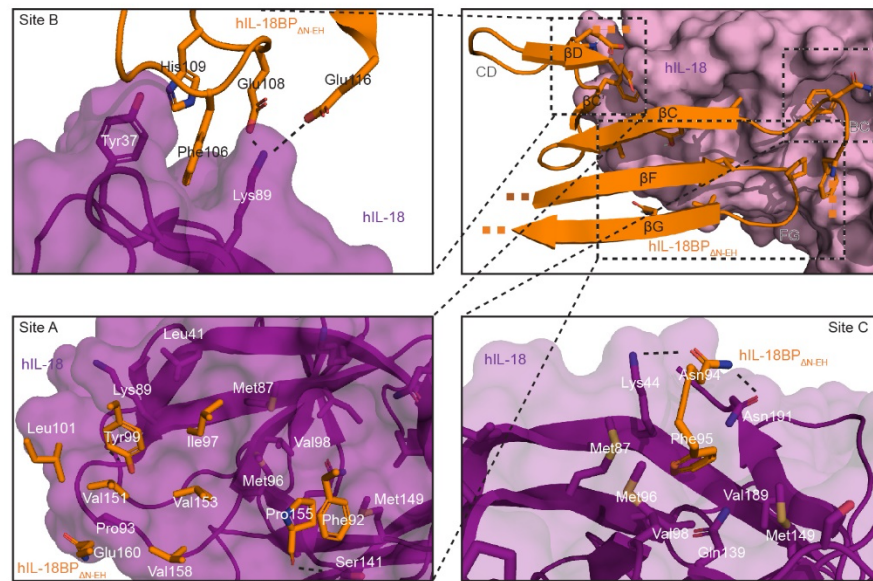

B

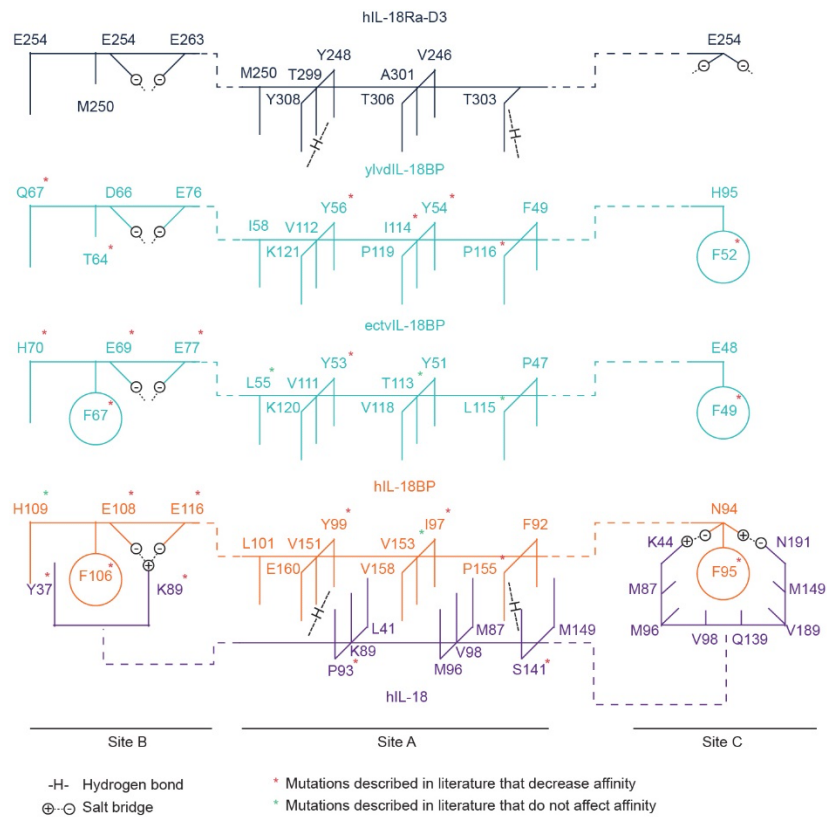

732



733 **Figure 3. Interaction interface between human IL-18 and human IL-18BP and comparisons with human IL-**  
734 **18 receptor and viral receptor decoys**

735 **(A)** Top right panel shows an overview of interacting structures of hIL-18BP $\Delta$ N-EH (cartoon, orange) with  
736 hIL-18 (surface, purple). Structures of hIL-18BP $\Delta$ N-EH shown consist out of the bottom half of the beta-  
737 sandwich, with the top half and non-interacting loops hidden. Top left, bottom left, and bottom right panels  
738 show zoomed-in views of the three main interaction sites B, A and C respectively, with hIL-18BP $\Delta$ N-EH and  
739 hIL-18 shown in cartoon representation with a transparent surface overlay for hIL-18. Key residues are  
740 shown in stick representation colored by element (blue: nitrogen, red: oxygen, yellow: sulfur, white: polar  
741 hydrogens, orange/purple: carbon). Non-polar hydrogens are hidden.

742 **(B)** Diagrams show simplified interactions at site A, B and C of hIL-18 (purple) with hIL-18BP (orange), viral  
743 ectvIL-18BP and yldvIL-18BP (cyan), and domain 3 of hIL-18Ra (dark blue). The interaction between hIL-18  
744 and hIL-18BP consists of 3 sites: A, B and C. Site A consists of interlocking rows of hydrophobic residues.  
745 Site B consist of a phenylalanine flanked by hydrophobic side chains supplemented with two salt bridges.  
746 Site C consists of a phenylalanine residing in a large pocket lined by hydrophobic residues supplemented  
747 by two salt bridges. Notable differences with ectvIL-18BP and yldvIL-18BP are missing salt bridges at site C,  
748 even though a capable side chain is present for ectvIL-18BP. yldvIL-18BP also has a threonine replacing the  
749 phenylalanine at site B. hIL-18Ra-D3 does have the salt bridges at site C, but is lacking the phenylalanine  
750 with no substitution, while at site B, the phenylalanine is replaced with a methionine. Residues marked with  
751 a red asterisk have been reported to have reduced affinity after certain mutations. Residues marked with  
752 a green asterisk have been reported to not be affected by certain mutations. Mutagenesis data adopted  
753 from previously reported studies(22, 23, 26, 57, 84, 85).

754

755 **FIGURE 4**

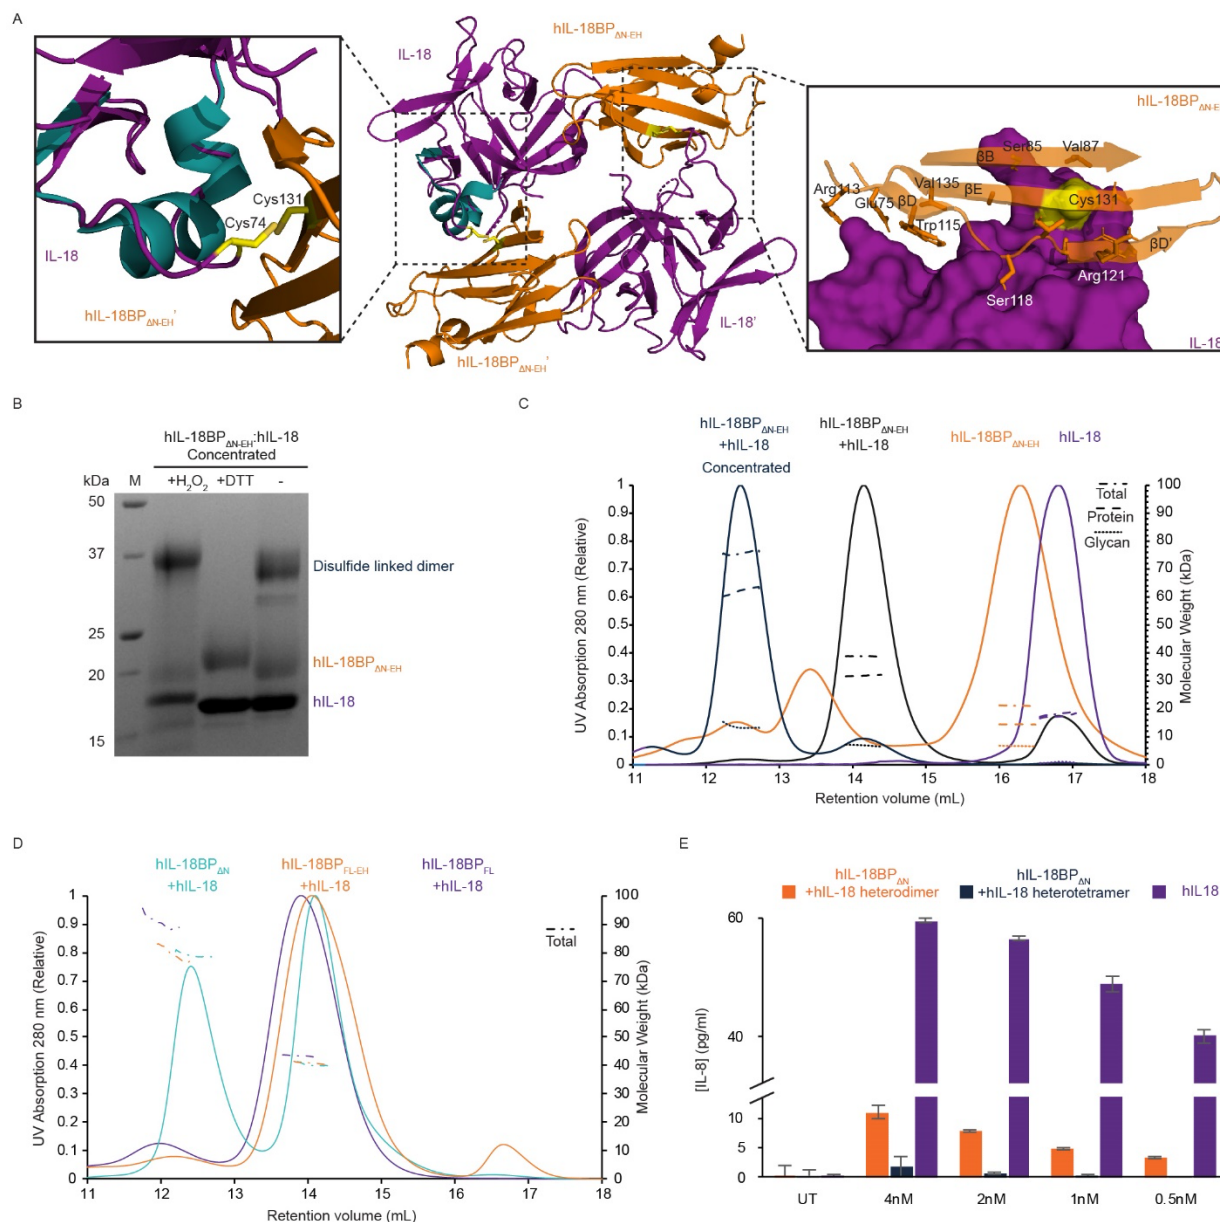

756

757 **Figure 4. Tetrapartite assembly of human IL-18 and human IL-18BP**

758 **(A)** Two complexes of hIL-18:hIL-18BP<sub>ΔN-EH</sub> are linked through an intermolecular disulfide bridge between  
 759 hIL-18 and hIL-18BP<sub>ΔN-EH</sub> from neighboring symmetric related unit forming a heterotetrameric assembly  
 760 with a novel interface. Middle panel shows an overview of the assembly using cartoon representation of  
 761 hIL-18 (purple or teal) and hIL-18BP<sub>ΔN-EH</sub> (orange) with the disulfide links involved shown in yellow stick  
 762 representation. Left panel shows a zoomed-in view with an aligned overlay of the 3<sub>10</sub> α-helix from a crystal  
 763 structure of unbound hIL-18 (teal, pdb 3wo2(26)) showing disruption of the helix upon formation of the  
 764 disulfide link. The right panel displays the novel interface surrounding the disulfide link with hIL-18 shown  
 765 in surface representation (purple, pdb 7al7) and hIL-18BP<sub>ΔN-EH</sub> in cartoon representation (orange, pdb 7al7)  
 766 with key residues displayed in stick representation. Strands, loops and key residues are labeled accordingly.

767 **(B)** SDS-PAGE analysis of hIL-18:hIL-18BP<sub>ΔN-EH</sub> complex sample after concentration to 30 mg/ml prior to  
768 crystallization and diluting back to 0.5 mg/ml with oxidizing (H<sub>2</sub>O<sub>2</sub>), reducing (DTT) or no agents added.  
769 Reduction results in dissociation of the otherwise disulfide-linked tetramer.

770 **(C)** SEC-MALLS analysis of hIL-18, hIL-18BP<sub>ΔN-EH</sub> and hIL-18:hIL-18BP<sub>ΔN-EH</sub> complex before and after  
771 concentration to 30 mg/ml prior to and diluting back to 0.5 mg/ml. Line plots show the SEC retention profile  
772 of samples detected by UV (left axis). Interrupted lines plot the molecular weights of the sample over the  
773 course of the SEC peak, dissected by protein conjugate analysis in total (dashed and dotted), protein  
774 (dashed) and glycan (dotted) mass (right axis).

775 **(D)** SEC-MALLS analysis of hIL-18:hIL-18BP<sub>ΔN</sub> and hIL-18:hIL-18BP<sub>FL</sub> complex sample after concentration to  
776 30 mg/ml and diluting back to 0.5 mg/ml. Line plots show the SEC retention profile of samples detected by  
777 UV (left axis). Interrupted lines plot the molecular weights of the sample over the course of the SEC peak,  
778 dissected by protein conjugate analysis in total (dashed and dotted), protein (dashed) and glycan (dotted)  
779 mass (right axis).

780 **(E)** Bar plot of IL-8 levels (y-axis, pg/mL) in conditioned media after human IL-18 stimulation in presence or  
781 absence of dimeric or tetrameric IL-18BP<sub>ΔN-EH</sub>:IL-18 complex. Recombinant IL-18 was pre-incubated for 1 h  
782 at 37°C with the indicated concentrations of full-length IL-18BP or IL-18BP<sub>ΔN-EH</sub>. KG-1 cells were left  
783 untreated (UT) or stimulated with IL-18 (purple) (0.5 nM final concentration) +/- IL-18BP (teal and orange),  
784 as indicated. After 18 h, IL-8 concentration in cell culture supernatants was measured by ELISA. Error bars  
785 display standard deviation (SEM).

## Supplementary Information for

### Structural basis of human IL-18 sequestration by the decoy receptor IL-18 binding protein (IL-18BP) in inflammation and tumor immunity

Sammy Detry<sup>1,2,#</sup>, Julie Andries<sup>1,2,#</sup>, Yehudi Bloch<sup>1,2</sup>, Cem Gabay<sup>3</sup>, Danielle Clancy<sup>1,2</sup>, Savvas N. Savvides<sup>1,2,\*</sup>

<sup>1</sup>Unit for Structural Biology, Department of Biochemistry and Microbiology, Ghent University, Technologiepark 71, 9052 Ghent, Belgium.

<sup>2</sup>Unit for Structural Biology, VIB Center for Inflammation Research, Technologiepark 71, 9052 Ghent, Belgium.

<sup>3</sup>Division of Rheumatology, Department of Medicine, Geneva University Hospitals & Faculty of Medicine University of Geneva, CH-1211 Geneva 14, Switzerland.

#These authors contributed equally

\*Corresponding author: [savvas.savvides@ugent.be](mailto:savvas.savvides@ugent.be)

#### This PDF file includes:

Figures S1 to S2  
Tables  
SI References

## SUPPLEMENTAL FIGURE 1 (legend below)

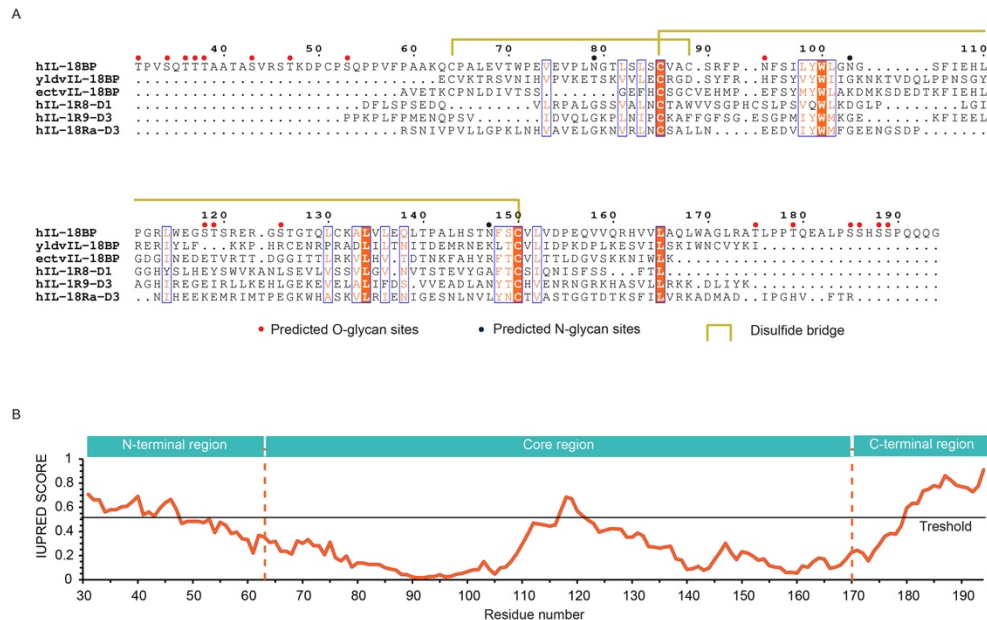

### Supplemental Figure 1. Sequence analysis for protein construct optimization

**(A)** Sequence alignment performed by Clustal Omega<sup>1</sup> visualized by ESPrpt<sup>2</sup> of hIL-18BP and related sequences. The core-region was delineated based on the sequence alignment, disordered region prediction and existing crystal structures of viral IL-18BPs. Gaps in the sequence alignment are represented by dots. Residues with strict identity have an orange background, residues with similarity are colored orange. Groups of high similarity residues are surrounded by a blue box. Predicted N-<sup>3</sup> and O-glycan<sup>4</sup> sites are displayed as blue and red dots respectively. Linked disulfides are represented by yellow lines (full or dashed).

**(B)** IUPRED prediction<sup>5</sup> of disordered regions in human IL-18BP show that the extended N- and C-termini are likely disordered and flexible. Disorder threshold is represented by a black horizontal line. Delineation of tested terminal truncations is represented by vertical dashed orange lines.

## SUPPLEMENTAL FIGURE 2 (legend below)

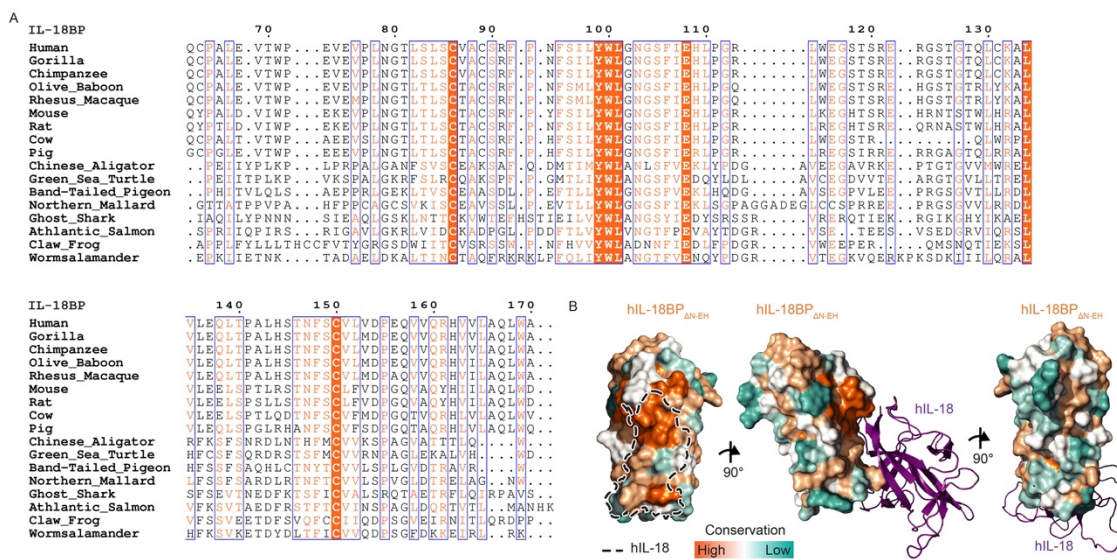

### Supplemental Figure 2. Sequence conservation for hIL-18BP

(A) Sequence alignment of core region of orthologous IL-18BPs between species across the animal kingdom. Residues with strict identity have an orange background, residues with similarity are colored orange. Groups of high similarity residues are surrounded by a blue box. Color scale above the sequence of hIL-18BP represents conservation levels determined by ConSurf<sup>6</sup>, with high conservation colored in orange, low conservation levels in teal and white in between. The same scale is used in panel B.

(B) Surface representation of hIL-18BP<sub>ΔN-EH</sub> colored by residue conservation. hIL-18 binding to hIL-18BP<sub>ΔN-EH</sub> is either displayed in cartoon representation (purple, two right panels) or shown as a black dashed line representing the patch it covers on hIL-18BP<sub>ΔN-EH</sub>.

Supplementary Table 1. Molecular weights and binding parameters of recombinant hIL-18 and hIL-18BP proteins

| Protein (complex)                | MW (kDa) | Molecular Weight determined by MALLS |                       |                      | Binding to hIL-18 determined by ITC |                                 |
|----------------------------------|----------|--------------------------------------|-----------------------|----------------------|-------------------------------------|---------------------------------|
|                                  |          | Total MW ± SD (kDa)                  | Protein MW ± SD (kDa) | glycan MW ± SD (kDa) | $K_D$ (95% CI) (nM)                 | $\Delta H$ (95% CI) (kcal/mole) |
| hIL-18                           | 18.2     | 18.2 ± 0.5                           | -                     | -                    | -                                   | -                               |
| hIL-18BP <sub>FL</sub>           | 17.6     | 32.4 ± 0.5                           | 17.6 ± 0.1            | 14.8 ± 0.6           | n.d. (-∞-0.245)                     | -19.32 (-18.33 - -20.32)        |
| hIL-18BP <sub>ΔN</sub>           | 14.4     | 24.0 ± 0.2                           | 14.65 ± 0.06          | 9.3 ± 0.1            | -                                   | -                               |
| hIL-18BP <sub>ΔN-EH</sub>        | 14.4     | 21.12 ± 0.09                         | 14.42 ± 0.02          | 6.71 ± 0.08          | n.d. (-∞-0.817)                     | -18.13 (-16.91 - -19.36)        |
| hIL-18 hIL-18BP <sub>ΔN-EH</sub> | 32.6     | 38.80 ± 0.06                         | 31.9 ± 0.2            | 6.9 ± 0.2            | -                                   | -                               |
| hIL-18Rα                         | 35.4     | -                                    | -                     | -                    | 5.24 (7.94-3.38)                    | -26.63 (-25.59 - -27.77)        |

MW: Molecular weight, SD: Standard Deviation, CI: Confidence interval, MALLS: Multi-Angle Laser Light Scattering, ITC: Isothermal Titration Calorimetry

## SI References

1. Madeira, F. *et al.* The EMBL-EBI search and sequence analysis tools APIs in 2019. *Nucleic Acids Res.* **47**, W636–W641 (2019).
2. Robert, X. & Gouet, P. Deciphering key features in protein structures with the new ENDscript server. *Nucleic Acids Res.* **42**, W320–W324 (2014).
3. R. Gupta, E. J. & Brunak, S. Prediction of N-glycosylation sites in human proteins. (2004).
4. Steentoft, C. *et al.* Precision mapping of the human O-GalNAc glycoproteome through SimpleCell technology. *EMBO J.* **32**, 1478–1488 (2013).
5. Dosztanyi, Z., Csizmok, V., Tompa, P. & Simon, I. IUPred: web server for the prediction of intrinsically unstructured regions of proteins based on estimated energy content. *Bioinformatics* **21**, 3433–3434 (2005).
6. Ashkenazy, H. *et al.* ConSurf 2016: an improved methodology to estimate and visualize evolutionary conservation in macromolecules. *Nucleic Acids Res.* **44**, W344–W350 (2016).
